1 Title

2 **Human mesenchymal stem cells and derived extracellular vesicles**  
3 **reduce sensory neuron hyperexcitability and pain-related**  
4 **behaviors in a mouse model of osteoarthritis**

5

6 **Authors**

7 Minji Ai<sup>1</sup>, William E. Hotham<sup>2,3</sup>, Luke A. Pattison<sup>4</sup>, Qingxi Ma<sup>4</sup>, Frances M.D. Henson<sup>2\*</sup>, and  
8 Ewan St. John. Smith<sup>4\*</sup>

9

10 **Affiliation:**

11 <sup>1</sup>Department of Veterinary Medicine, University of Cambridge, UK

12 <sup>2</sup>Department of Surgery, University of Cambridge, UK

13 <sup>3</sup>Department of Medicine, University of Nottingham, UK

14 <sup>4</sup>Department of Pharmacology, University of Cambridge, UK

15

16 **\*Corresponding Authors**

17 Frances M.D. Henson, Division of Trauma and Orthopaedic Surgery, Department of Surgery,  
18 University of Cambridge, Box 202, Addenbrooke's Hospital, Hill's Rd, Cambridge CB2 0QQ,  
19 UK. Email: [fmdh1@cam.ac.uk](mailto:fmdh1@cam.ac.uk)

20 Ewan St. John Smith, Department of Pharmacology, University of Cambridge, Tennis Court  
21 Road, Cambridge CB2 1PD, United Kingdom, Email: [es336@cam.ac.uk](mailto:es336@cam.ac.uk)

22

23

24

25 **Abstract (150 words)**

26 Osteoarthritis (OA) is a common degenerative joint disease characterized by joint pain and  
27 stiffness. In humans, mesenchymal stem cells (MSCs) and derived extracellular vesicles  
28 (MSC-EVs) have been reported to alleviate pain in knee OA. Here, we used the destabilization  
29 of the medial meniscus (DMM) mouse model of OA to investigate mechanisms by which  
30 MSCs and MSC-EVs influence pain-related behavior. We found that MSC and MSC-EV  
31 treated DMM mice displayed improved OA pain-related behavior (i.e. locomotion, digging and  
32 sleep) compared to untreated DMM mice. Improved behavior was not the result of reduced  
33 joint damage, but rather knee-innervating sensory neurons from MSC and MSC-EV treated  
34 mice did not display the hyperexcitability observed in untreated DMM mice. Furthermore, we  
35 found that MSC-EVs normalize sensory neuron hyperexcitability induced by nerve growth  
36 factor *in vitro*. Our study suggests that MSCs and MSC-EVs may reduce pain in OA by direct  
37 action on peripheral sensory neurons.

38

39 **Teaser**

40 Mesenchymal stem cells and secreted extracellular vesicles normalize sensory neuron  
41 excitability to reduce pain.

42

43

44

45

## 46 **Introduction**

47 Osteoarthritis (OA) is a debilitating musculoskeletal disease affecting over 250 million people  
48 worldwide (1). Chronic pain is the primary OA symptom and the major driver for both seeking  
49 medical attention and clinical decision making (2, 3). Poorly managed OA pain can lead to  
50 limited joint function (4), reduced quality of life (e.g. compromised sleep quality, anxiety, and  
51 depression) (5, 6), and disability in patients (7). Unfortunately, currently used pharmacological  
52 treatments for OA pain (e.g. non-steroidal anti-inflammatory drugs and opioids) fail to provide  
53 sufficient pain relief and are often associated with unwanted side effects following long-term  
54 use (8). Thus, managing OA pain remains challenging and requires disease specific analgesics  
55 to address this unmet clinical need.

56  
57 Peripheral input is a major contributor to OA pain as demonstrated by reduced pain in OA  
58 patients following: i) intra-articular injections of the local anesthetic lidocaine (9), ii) a  
59 peripherally restricted anti-nerve growth factor (NGF) antibody (10) and iii) total knee  
60 replacement (although pain persists in some patients) (11). Moreover, in rodents, inhibition of  
61 nociceptor activity with the quaternary anesthetic QX-314 ameliorated early OA pain (12), and  
62 we have previously shown that pain behaviors following joint injury can be reversed through  
63 chemogenetic inhibition of knee-innervating sensory neurons (13). Furthermore, in the  
64 monoiodoacetate model of OA in rats, it has been shown that knee-innervating extracellular  
65 electrophysiological recordings become sensitized early after disease onset (from day 3) and  
66 that this is maintained, whereas bone-innervating afferents only become sensitized late in  
67 disease (day 28) (14). The OA joint contains multiple cell types and mediators that have been  
68 identified as drivers of OA pain. Studies have identified several key molecules that are thought  
69 to drive OA pain and thus have been developed as disease specific pain target. For example,  
70 NGF was first identified as a pain target for OA as its expression was elevated in a murine OA  
71 model (15) and treatment with soluble NGF receptor tropomyosin receptor kinase A (TrkA)  
72 (15), anti-NGF antibody (16), and inhibition of the TrkA receptor (17) can all effectively  
73 suppress pain like behavior in rodent OA models. Moreover, a number of anti-NGF antibodies  
74 have demonstrated clinical efficacy in managing OA pain in patients, but the risk of causing  
75 rapidly progressive OA (perhaps in part by removing the protective effect of reduced weigh  
76 bearing on the diseased joint) has thus far prevented their clinical application (18). In addition,  
77 there has also been significant interest in the chemokine CCL2: animal studies revealed that  
78 blockade of the CCL2 receptor CCR2 improves pain symptoms in murine OA (19), and  
79 absence of both CCL2 and CCR2 delay OA pain development (20). Similarly, there is

80 gathering evidence for a role of the aggrecan 32-mer fragment activating Toll-like receptor 2  
81 to drive OA joint pain (21).

82

83 In search of a mechanism based therapeutic for OA, mesenchymal stem/stromal cell (MSC)  
84 therapy has emerged as a promising treatment, with clinical trials demonstrating pain relief and  
85 improved joint function in OA patients (22). The typical OA joint is characterized by cartilage  
86 loss and synovitis, which can be improved by MSCs primarily through immunomodulation.  
87 MSCs exert a strong immunomodulatory effect through the secretion of soluble factors such as  
88 anti-inflammatory proteins (e.g. Tumour necrosis factor (TNF)- $\alpha$ -stimulated gene 6 protein  
89 (TSG-6) (23)) and growth factors (e.g. transforming growth factor beta (TGF- $\beta$ ) (24)), which  
90 lead to analgesic and anti-catabolic effects in OA joints (25). The effects of MSCs, then, are to  
91 improve the joint microenvironment. However, a further possibility exists that they may  
92 directly alter the nociceptive input, which would contribute to the pain relief experienced by  
93 those with OA. However, a direct link between MSCs and nociception in OA remains  
94 unexplored, i.e., do MSCs affect neuronal excitability?

95

96 Despite promising outcomes, the clinical use of MSCs faces a number of safety concerns such  
97 as potential tumorigenicity (26). Therefore, extracellular vesicles (EVs) secreted by MSCs,  
98 have been proposed as an alternative to MSCs for treating OA, indeed, increasing evidence has  
99 attributed the therapeutic effects of MSCs to their paracrine secretion, especially of EVs (27–  
100 29). EVs are small sized, membrane bound vesicles (30–200 nm) that are secreted into the  
101 extracellular space by cells, including MSCs (30). Within EVs, there is a rich profile of  
102 biomolecules, including proteins, lipids, and nucleic acids, which have strong  
103 immunomodulating and chondroprotective properties (31). Although MSC derived EVs  
104 (MSC-EVs) are a highly heterogenous population, they can be broadly distinguished into three  
105 types based on their biological origins: exosomes, microvesicles and apoptotic bodies (32).  
106 Exosomes are small vesicles are secreted through a fusion of endosomal multi-vesicular bodies  
107 (MVBs) with the plasma membrane (exosomes, 30–120 nm) (33), while microvesicles are  
108 formed through the direct outward budding of cell membrane (microvesicles, 100–1000 nm)  
109 (34). Preclinical studies show that MSC-EVs derived from various sources (e.g. adipose, bone  
110 marrow, and umbilical cord MSCs) exert a similar therapeutic effect to their source cells in  
111 different OA models, such as inhibiting joint inflammation and promoting cartilage repair (35).  
112 However, the analgesic effects of MSC-EVs in OA remains unknown. In the present study, we  
113 aimed to determine to what extent either MSCs or MSC-EVs provide analgesia through

114 studying their impact on nociception in the OA joint. We hypothesized that MSCs and MSC-  
115 EVs would improve OA pain via direct modulation of sensory neurons innervating the joint.

116

## 117 **Results**

118 To test the hypothesis that MSCs and MSC-EVs directly modulate joint-innervating neurons  
119 to produce pain relief, we surgically induced knee OA in 10-week-old, male C57Bl6/J mice by  
120 conducting destabilization of the medial meniscus (DMM) surgery and randomly assigned  
121 mice into 4 experimental groups: sham, DMM, DMM+MSCs, DMM+MSC-EVs (Fig. 1A).  
122 Human MSCs were purchased commercially (Lonza, UK) and derived MSC-EVs were  
123 harvested and characterized as previously described (Fig.S1) (36). To exclude the regenerative  
124 effects of MSCs and MSC-EVs in OA that can be observed when administered at week 4 post  
125 DMM surgery (37), we started MSC/MSC-EV treatment from 12 weeks post-DMM surgery at  
126 which point OA is well established (Fig. 1A).

127

### 128 **MSCs and MSC-EVs improve pain-related behavior changes in DMM mice**

129 To examine if MSC or MSC-EV treatment improves pain-related behavior in DMM mice, we  
130 used three different methods to monitor mouse behavior: rotarod test, digging test, and Digital  
131 Ventilated Cage<sup>®</sup> (DVC) system. All these measurements examine how DMM-induced pain  
132 affects normal mouse behavior, rather than evoked pain, to better align with how on-going pain  
133 affects the behavior of those individuals living with OA pain. Because the rotarod forces an  
134 animal to behave in a certain way and ability to perform is likely to be impacted by surgery, it  
135 was only conducted weekly from week 4 post-surgery, whereas the digging test was carried  
136 out weekly from one week pre-surgery and DVC measurements were made for the duration of  
137 the study, also from one week pre-surgery (Fig. 1B).

138

139 The daily use of a painful joint lead to behavioral adaptation affecting gait resulting in a  
140 locomotion deficit (38). Previous studies reported reduced locomotion in DMM mice after 16  
141 weeks using rotarod tests (39, 40). We observed that untreated DMM operated mice started to  
142 spend significantly less time on the rotarod than sham mice at week 15 (week 15: Sham: 256.4  
143  $\pm$  14.6 sec vs. DMM: 199  $\pm$  13.88 sec;  $p = 0.03$ ) and at week 16 (week 16: Sham: 256.4  $\pm$  14.6  
144 sec vs. DMM: 177.1  $\pm$  14.77 sec;  $p = 0.0008$ , Two-way ANOVA with Dunnett's multiple  
145 comparisons test, Fig. 1C). By contrast, MSC and MSC-EV treated DMM mice spent a longer  
146 time on the rotarod than untreated DMM mice with no significant difference compared to sham  
147 mice at week 16 (DMM+MSCs: 224.8  $\pm$  11.88 sec;  $p = 0.06$ , DMM+MSC-EVs: 219.4  $\pm$  20.57

148 sec;  $p = 0.09$ , Two-way ANOVA with Dunnett's multiple comparisons test, Fig. 1C).  
149 Additionally, untreated DMM mice also spend significant less time on the rod at 16 weeks than  
150 they did at 4 weeks (week 4:  $262.2 \pm 10.89$  sec,  $p = 0.0003$ , unpaired t test, Fig. 1D), while  
151 such within group difference was absent in Sham (week 4:  $263.7 \pm 10.73$  sec,  $p = 0.71$ , unpaired  
152 t test) or treated DMM mice (DMM+MSCs: week 4:  $227.7 \pm 15.91$  sec,  $p = 0.88$ , unpaired t  
153 test; DMM+MSC-EVs: week 4:  $236 \pm 14.58$  sec,  $p = 0.3$ , unpaired t test, Fig. 1D).

154

155 We reported previously that mice with joint pain spend less time digging burrows than healthy  
156 mice, the digging behavior of mice can thus be considered an ethologically relevant pain assay  
157 (41). In the digging test, in line with the rotarod test, we observed that untreated DMM mice  
158 spend significantly less time digging than sham mice at week 16, while MSC and MSC-EV  
159 treated DMM mice exhibit a similar digging duration to sham mice (Sham:  $19.79 \pm 5.07$  sec;  
160 DMM:  $5.59 \pm 2.45$  sec,  $p = 0.03$ , DMM+MSCs:  $15.87 \pm 4.59$  sec,  $p = 0.89$ ; DMM+MSCs:  
161  $12.32 \pm 3.03$  sec,  $p = 0.46$ ; Two-way ANOVA with Dunnett's multiple comparisons test, Fig.  
162 1E). Consistently, untreated DMM mice dug significantly fewer burrows than sham mice at  
163 week 16, whereas the number of burrows dug by MSC and MSC-EV treated DMM mice was  
164 similar in number to those dug by sham mice (Sham:  $2.77 \pm 0.32$ ; DMM:  $1.4 \pm 0.26$ ;  $p = 0.02$ ,  
165 DMM+MSCs:  $2.44 \pm 0.53$ ;  $p = 0.9$ , DMM+MSCs:  $3 \pm 0.40$ ;  $p = 0.95$ , Two-way ANOVA with  
166 Dunnett's multiple comparisons test, Fig. 1G). However, innate digging differences were  
167 observed among mice group. Mice in DMM+MSC-EVs group presented a significantly lower  
168 digging duration (week -1: Sham:  $26.66 \pm 5.16$  sec, DMM+MSC-EVs:  $4.25 \pm 1.51$  sec,  $p =$   
169  $0.005$ , Two-way ANOVA with Dunnett's multiple comparisons test, Fig. 1E) and dug fewer  
170 burrows than sham mice pre-surgery (week -1: Sham:  $3.55 \pm 0.37$ , DMM+MSC-EVs:  $1.37 \pm$   
171  $0.37$ ,  $p = 0.001$ , Two-way ANOVA with Dunnett's multiple comparisons test, Fig. 1G).  
172 Comparing to pre-surgery, untreated DMM mice presented reduced digging duration (week -  
173 1:  $13.84 \pm 3.8$ ,  $p = 0.02$ , unpaired t test, Fig. 1F) and fewer burrows dug (week -1:  $4.11 \pm 0.78$ ,  
174  $p < 0.0001$ , unpaired t test, Fig. 1H) at 16 weeks, while both sham and MSC treated DMM  
175 mice had a similar digging duration (week -1: Sham:  $26.66 \pm 5.16$ ,  $p = 0.35$ , DMM+MSCs:  
176  $13.82 \pm 2.7$ ,  $p = 0.7$ , unpaired t test, Fig. 1F) and number of burrows dug (week -1: Sham:  $3.55$   
177  $\pm 0.37$ ,  $p = 0.13$ , DMM+MSCs:  $2.55 \pm 0.47$ ,  $p = 0.65$ , unpaired t test, Fig. 1H) as pre-surgery.  
178 An increase of both digging duration (week -1:  $12.32 \pm 3$ ,  $p = 0.03$ , unpaired t test, Fig. 1F)  
179 and number of burrows dug (week -1:  $3.25 \pm 0.36$ ,  $p = 0.003$ , unpaired t test, Fig. 1H) were  
180 seen in MSC+EV treated DMM mice at 16 weeks.

181

182 Unlike both the rotarod and digging tests which can only be conducted at set intervals, the  
183 DVC<sup>®</sup> system monitors mice activity 24/7. As expected, mice exhibited a high level of activity  
184 during the lights off period and compared to the lights on period (Fig. S2A). However,  
185 increased irregular activity bouts were seen in DMM mice during the lights on period (i.e.  
186 sleep/rest period) in the last week of housing (Fig.S2B, purple box), suggesting a possible rest  
187 pattern irregularity in DMM mice caused by pain, similar to the impact of OA on sleep  
188 observed in humans (5). This irregular activity pattern was computed as regularity disturbance  
189 index (RDI), a digital biomarker measuring such irregularity (42). We found that DMM mice  
190 developed a significantly higher lights on RDI value than sham mice at week 16 (Sham:  $0.12$   
191  $\pm 0.028$  vs. DMM:  $0.45 \pm 0.036$ ;  $p = 0.006$ , Two-way ANOVA with Dunnett's multiple  
192 comparisons test, Fig. 1I), suggesting a more perturbed rest pattern during lights on in DMM  
193 mice. Such an increase in light period RDI was not observed in DMM mice treated with either  
194 MSCs or MSC-EVs at week 16 (DMM+MSCs:  $0.19 \pm 0.036$ ,  $p = 0.48$ ; DMM+MSC-EVs:  $0.23$   
195  $\pm 0.049$ ,  $p = 0.29$ ; Two-way ANOVA with Dunnett's multiple comparisons test, Fig. 1I).  
196 Similarly, light period RDI of untreated DMM mice at 16 weeks was also significantly higher  
197 than their pre-surgery level (week -1:  $0.18 \pm 0.07$ ,  $p = 0.002$ , unpaired t test, Fig. 1J). This rise  
198 of RDI was not seen in DMM mice treated with either MSCs (week -1:  $0.25 \pm 0.04$ ,  $p = 0.32$ ,  
199 unpaired t test, Fig. 1J) or MSC-EVs (week -1:  $0.29 \pm 0.03$ ,  $p = 0.36$ , unpaired t test, Fig. 1J).  
200 A decrease of light RDI was observed in Sham mice at 16 weeks (week -1:  $0.22 \pm 0.01$ ,  $p =$   
201  $0.04$ , unpaired t test, Fig. 1J).

202

203 Taken together, these results suggest that MSCs and MSC-EVs both improve pain related  
204 behaviors in DMM mice.

205

206

207

208

209

210

211

212

213

214

215

# Figure 1

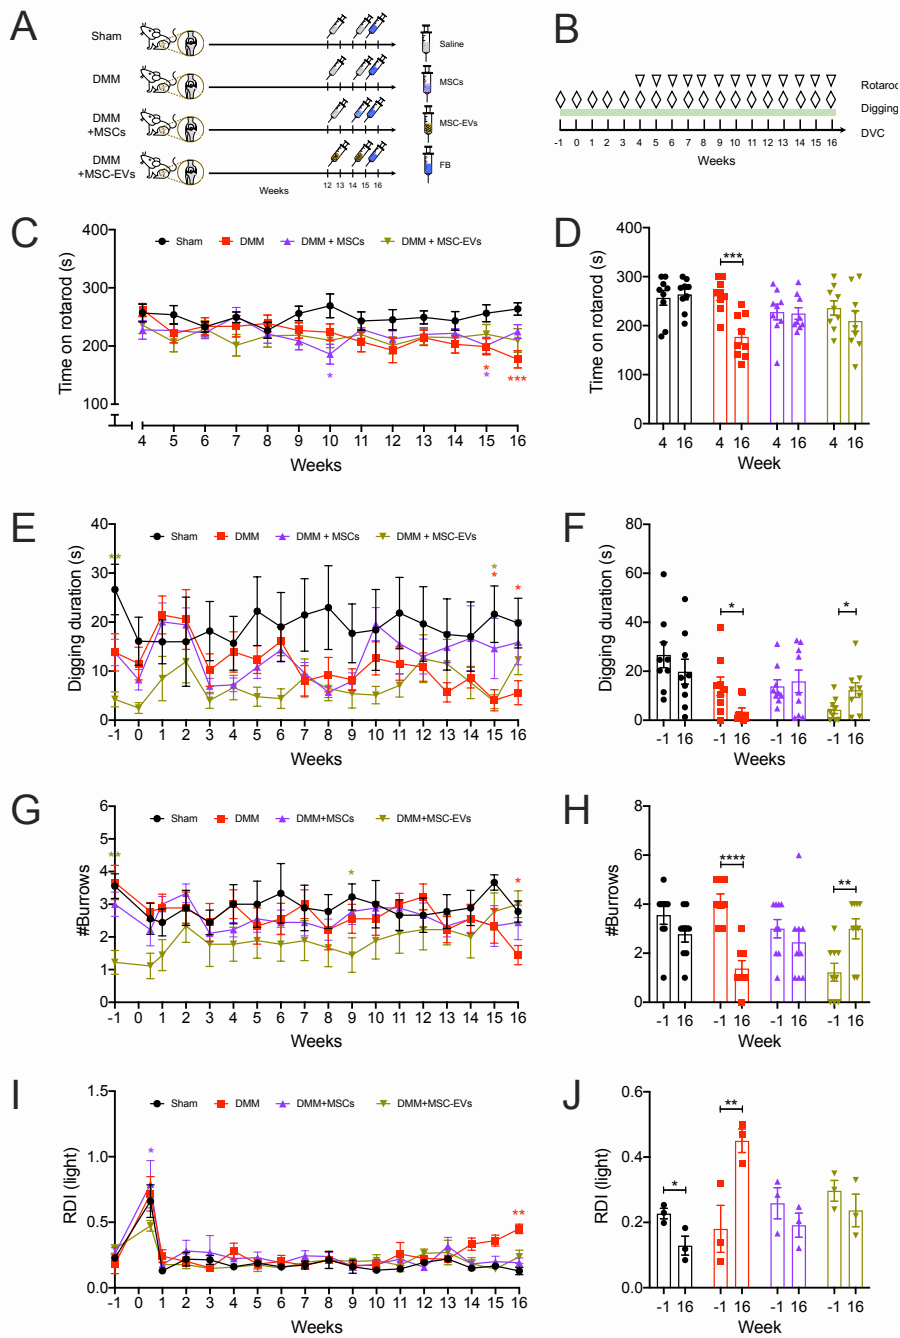

216

217

218

219

220

221

222

223

224

225

226

227

228

229

**Fig. 1. MSCs and MSC-EVs improves knee joint pain related behavior change in DMM mice.** (A) Schematic experimental design of in vivo study (n=9/group). (B) Timeline of conducted behavior tests. Total time mice spend on the rod (C) at each week, and comparison of time on rod within each mouse group at week 4 and week 16 post-surgery. The total time mice spend digging during the testing period (E) at different weeks, and the comparison of digging duration at pre-surgery and at week 16 post-surgery within each mouse group. The number of burrows mouse dug by mice at the end of each test (F) at each week, and comparison of burrows dug at pre-surgery and at week 16 post-surgery with each mouse group (H). Light period RDI value for mice during experimental period (I) and comparison of light period RDI at pre-surgery and at 16-week post-surgery with each mouse group (J). \*p<0.05, \*\*p<0.01, \*\*\*p<0.001, \*\*\*\*p<0.0001. ns, no significant difference. Two-way ANOVA with Dunnett's multiple comparisons test was used for behavior changes among four experimental groups across time series (C, E, J, I). Unpaired t test was used to compare behavior values at two different time points within each mouse group (D, F, H, J).



# Fig. S1

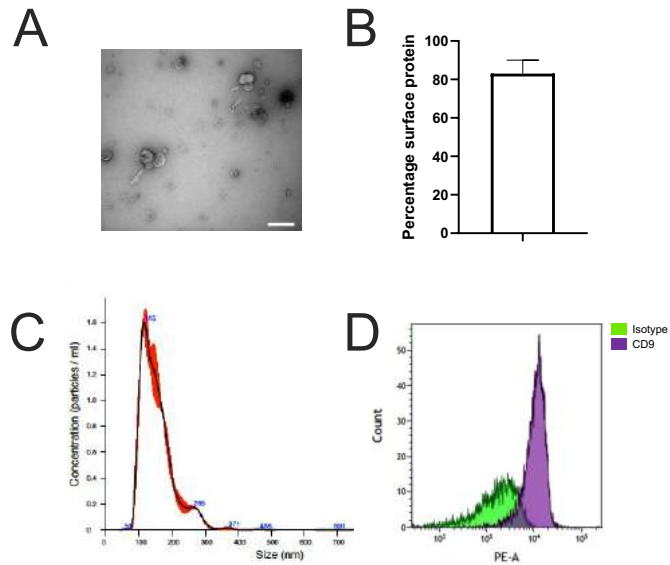

230  
231  
232  
233  
234  
235

**Fig.S1 The characterization of MSC-EVs.** (A) Representative image of MSC-EVs viewed with a transmission electron microscope, scale bar: 500 nm. (B) Percentage of MSC-EV surface protein. (C) Size distribution of MSC-EVs. Blue numbers indicate the mean particle size at the peak. Red band represent SEM range. (D) Positive signal of surface marker CD9 on MSC-EVs.

# Fig. S2

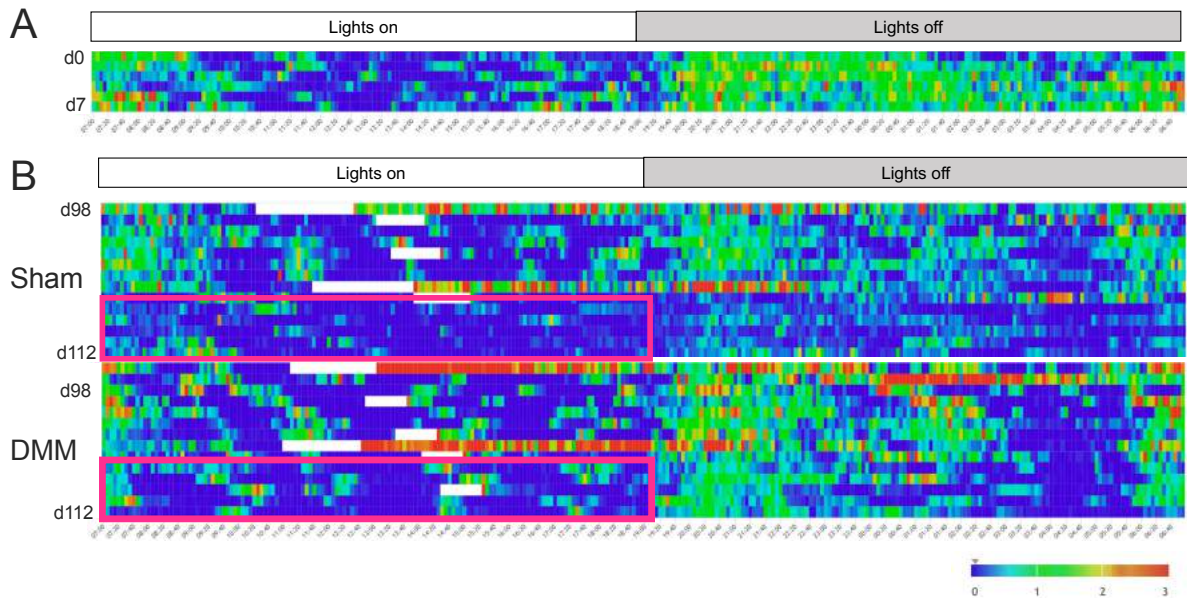

236  
237  
238  
239  
240  
241  
242  
243

**Fig.S2 Mouse activity monitored by DVC.** (A) Heatmap activity recorded from 3 experimental mice during a week prior than DMM or Sham surgery. Each colored block represents average activities recorded in 5 minutes. The 0-3 scale indicates activity values computed by extruding capacitance change. (B) Heatmap activity of sham and DMM mice from week 14 to week 16 after surgery. d98 and d112 refer to day 98 and day 112 post-surgery. White bars indicate when mice were removed from the cages for experimental procedures or behavioral tests and thus no data were recorded. The purple box shows irregular activity sprouts in DMM mice but not sham mice at week 16. Lights on period: 7:00 – 19:00; Lights off period: 19:00 – 7:00.

244 **MSCs and MSC-EVs do not improve joint damage in DMM mice**

245 MSCs and MSC-EVs promote cartilage repair in OA joints and have been used as regenerative  
246 treatments for OA (28). Therefore, we next examined whether the reduction in pain-related  
247 behaviors resulted from a lessening of disease progression with regard to joint structure. We  
248 performed Safranin O/fast green staining on operated mouse knee joints to evaluate the  
249 cartilage damage in different groups and observed that mice from all three DMM operated  
250 groups presented with severe joint cartilage damage compared to sham mice (Fig. 2A). We  
251 further quantified this observed damage using the Osteoarthritis Research Society International  
252 (OARSI) histologic grading system and found that compared to knee joints from sham mice,  
253 knee joints from mice in DMM operated groups showed a significantly higher OARSI score  
254 on both the medial femoral condyle (MFC) (Sham:  $0.39 \pm 0.16$ ; DMM:  $2.62 \pm 0.34$ ;  $p < 0.0001$ ,  
255 DMM+MSCs:  $2.24 \pm 0.22$ ,  $p < 0.0001$ ; DMM+MSC-EVs:  $3.06 \pm 0.35$ ,  $p < 0.0001$ ; One-way  
256 ANOVA with Dunnett's multiple comparison test, Fig. 2B) and the medial tibial condyle  
257 (MTC) (Sham:  $0.77 \pm 0.16$ ; DMM:  $3.08 \pm 0.61$ ;  $p = 0.004$ , DMM+MSCs:  $3.5 \pm 0.65$ ,  $p = 0.003$ ;  
258 DMM+MSC-EVs:  $3.81 \pm 0.6$ ,  $p = 0.0007$ ; One-way ANOVA with Dunnett's multiple  
259 comparison test, Fig. 2C). These data suggest that MSCs and MSC-EVs do not affect joint  
260 damage when injected after 12/14-weeks post-DMM surgery, and that the observed change in  
261 pain-related behaviors following MSC/MSC-EV treatment might thus result from an effect of  
262 MSCs/MSC-EVs on sensory neurons innervating the knee joint.

263  
264  
265  
266  
267  
268  
269  
270  
271  
272  
273  
274  
275  
276  
277

# Figure 2

A

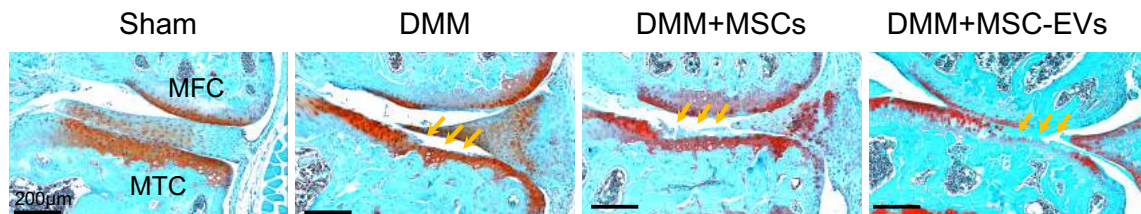

B

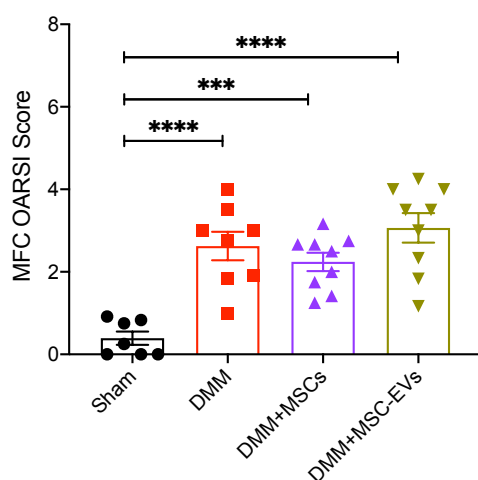

C

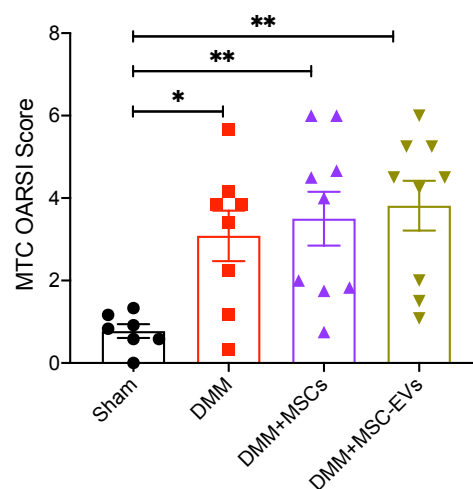

278

279 **Fig. 2. Administration of MSCs or MSC-EVs does not improve knee joint damage in DMM mice.** (A)  
 280 Representative images of Safran O/fast green stained operated knee joint sections from different mouse groups  
 281 16 weeks after DMM surgery, scale bar: 200  $\mu$ m. Cartilage are stained in red. Yellow arrows point cartilage loss  
 282 (reduced red stain or intact cartilage surface). OARSI score of medial tibia condyle (MTC) (B) and medial femoral  
 283 condyle (MFC) in different mouse groups. \* $p < 0.05$ , \*\* $p < 0.01$ , \*\*\* $p < 0.001$ , \*\*\*\* $p < 0.0001$ . One-way ANOVA  
 284 with Dunnett's multiple comparisons test.

285

## 286 MSCs and MSC-EVs normalize knee neuron hyperexcitability in DMM mice

287 We have previously shown that knee-innervating dorsal root ganglion (DRG) sensory neuron  
 288 excitability increases during acute joint inflammation and that inhibiting function of these  
 289 neurons normalizes pain-related behaviors (13, 41). In the DMM model, using in vivo  $Ca^{2+}$ -  
 290 imaging it has been shown that increased numbers of knee-innervating neurons respond to  
 291 mechanical stimuli at 8-weeks (43), but no in-depth analysis of the excitability of these neurons  
 292 has been made. Therefore, we injected the retrograde tracer fast blue (FB) into the operated  
 293 mouse knee joint to label knee-innervating neurons (Fig. 3A). Cell bodies of these labelled  
 294 neurons were then harvested after mice were sacrificed 16-weeks post-surgery and identified  
 295 by excitation with a 350 nm light source (Fig. 3A). Using whole cell patch clamp

296 electrophysiology, recording from neurons with similar diameters across groups (Table 1), we  
297 found that FB positive neurons in untreated DMM mice have a more depolarized resting  
298 membrane potential (RMP) compared to those from sham mice (Sham:  $-48.96 \pm 1.78$  mV vs.  
299 DMM:  $-37.52 \pm 2.49$  mV;  $p = 0.0009$ , One-way ANOVA with Dunnett's multiple comparison  
300 test, Fig. 3B) and exhibited a lower action potential (AP) threshold than those knee-innervating  
301 neurons from sham mice (Sham:  $509.6 \pm 45.93$  pA vs. DMM:  $350.8 \pm 37.52$  pA;  $p = 0.03$ , One-  
302 way ANOVA with Dunnett's multiple comparison test, Fig. 3C), results suggesting that DMM  
303 surgery induces knee-innervating neuron hyperexcitability that likely underpins the changes in  
304 pain-related behaviors observed. Additionally, the AP of knee-innervating neurons from  
305 untreated DMM also had a longer half peak duration (HPD) (Sham:  $1.53 \pm 0.2$  msec vs. DMM:  
306  $2.72 \pm 0.41$  msec;  $p = 0.019$ , One-way ANOVA with Dunnett's multiple comparison test, Fig.  
307 3D) and a longer afterhyperpolarization (AHP) duration (Sham:  $17.07 \pm 1.38$  msec vs. DMM:  
308  $29.84 \pm 3.54$  msec;  $p = 0.006$ , One-way ANOVA with Dunnett's multiple comparison test, Fig.  
309 3F) than knee-innervating neurons from sham mice. When measuring the properties of FB  
310 labelled knee-innervating neurons isolated from MSC and MSC-EV treated DMM mice, it was  
311 observed that neither their RMP (DMM+MSCs:  $-44.5 \pm 2.03$  mV,  $p = 0.29$ ; DMM+MSC-EVs:  
312  $-45.25 \pm 1.77$  mV,  $p = 0.44$ , One-way ANOVA with Dunnett's multiple comparison test, Fig.  
313 3B), nor their AP threshold (DMM+MSCs:  $560 \pm 43.53$  pA,  $p = 0.71$ ; DMM+MSC-EVs:  $607.5$   
314  $\pm 37.79$  pA,  $p = 0.24$ ; One-way ANOVA with Dunnett's multiple comparison test, Fig. 3C)  
315 were significantly different to those of knee-innervating neurons isolated from sham mice, i.e.  
316 MSC and MSC-EV treatment normalized DMM induced knee-innervating neuron  
317 hyperexcitability. Moreover, the longer HPD and AHP durations seen in knee-innervating  
318 neurons isolated from untreated DMM mice were also absent in those neurons isolated from  
319 DMM mice treated with MSCs and MSC-EVs (Table 1). As observed AP changes might result  
320 from changes in voltage-gated ion channel function, we thus analyzed the properties of  
321 macroscopic voltage-gated inward and outward currents (Fig. S3). However, little difference  
322 of normalized peak inward current (peak normalized current: Sham:  $1 \pm 0.08$ , DMM:  $1.05 \pm$   
323  $0.12$   $p = 0.7$ , unpaired t test, Fig. S3B) and outward current (peak normalized current: Sham:  $1$   
324  $\pm 0.13$ , DMM:  $1 \pm 0.1$ ,  $p = 0.99$ , unpaired t test, Fig. S3D) was observed among neurons  
325 isolated from sham and DMM mice. Thus, data acquired from the other two groups were not  
326 analyzed further. Overall, these results suggest that the improved pain-related behavioral  
327 change observed in MSC and MSC-EV treated DMM mice results from normalization of knee-  
328 innervating neuron hyperexcitability.

329

Figure 3

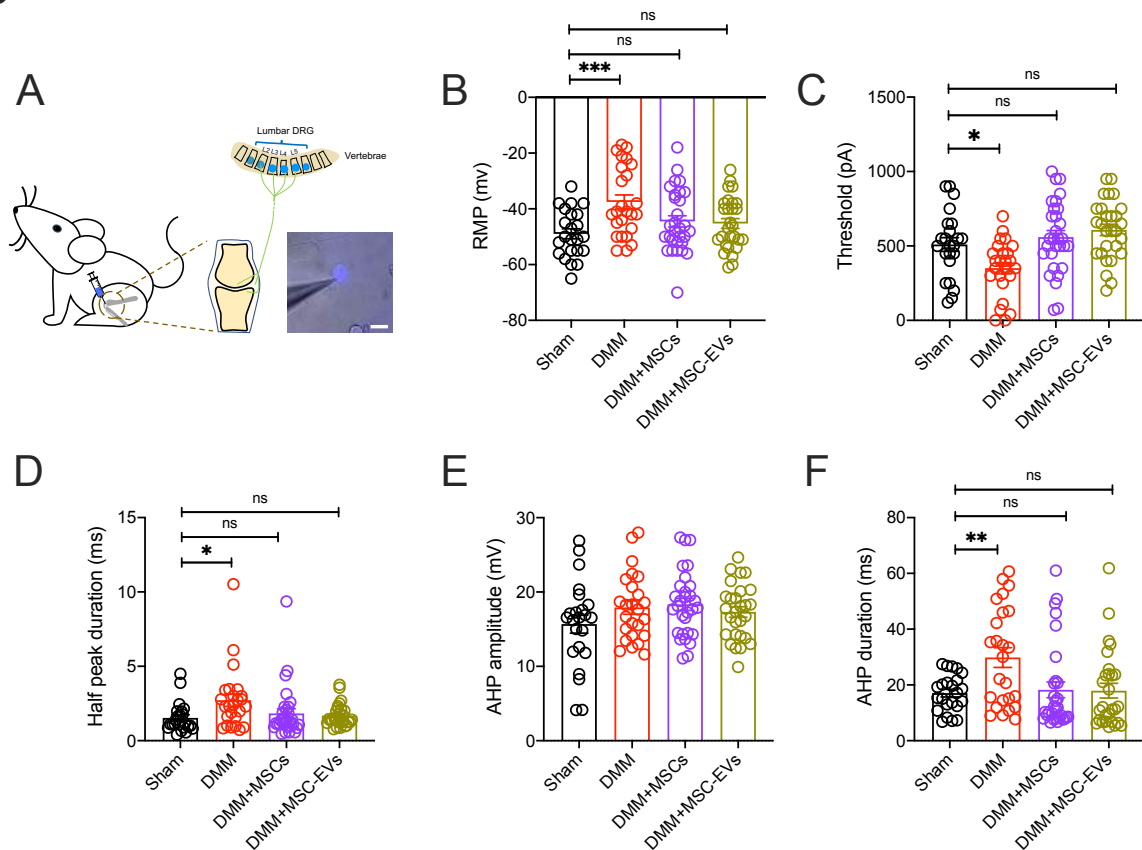

330

331 **Fig. 3. MSCs and MSC-EVs normalize knee-innervating neuron excitability in DMM mice.** (A) Retrograde  
 332 labelling of knee joint innervating neuron by fast blue (FB), scale bar = 50  $\mu$ m. (B) Resting membrane  
 333 potential (RMP) of FB labelled DRG neurons isolated from different groups. (C) Threshold of electrical stimulus required  
 334 for action potential (AP) firing in different FB DRG neurons. AP properties of FB DRG neurons including half  
 335 peak duration (D), AHP amplitude (E), and AHP duration (F). \* $p < 0.05$ , \*\* $p < 0.01$ , \*\*\* $p < 0.001$ . ns, no significant  
 336 difference. One-way ANOVA with Dunnett's multiple comparisons test.

337

Fig. S3

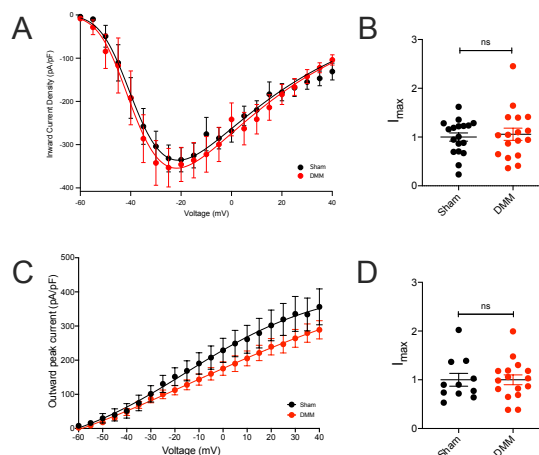

338

339 **Fig.S3 Voltage-gated macroscopic currents of FB neurons.** Plots of inward (A) and outward (B) current of FB  
 340 labelled DRG neurons at different voltage steps normalized by cell capacitance. Peak inward (B) and outward  
 341 current (D) normalized by maximum current density in sham FB neurons. ns, no significant difference. Unpaired  
 342 t test.

### 343 **MSC-EVs normalize NGF-induced DRG neuron hyperexcitability *in vitro***

344 Based on the ability of MSCs and MSC-EVs to induce the same reduction in pain-related  
345 behaviors and neuronal hyperexcitability, we hypothesized that the MSC secretome, including  
346 MSC-EVs, acts directly upon sensory neurons to normalize their hyperexcitability and in turn  
347 reduce pain. Based upon this hypothesis, incubation of DRG sensory neurons with MSC-EVs  
348 *in vitro* should be sufficient to normalize neuronal hyperexcitability. To test this hypothesis,  
349 we took advantage of the fact that NGF is associated with both OA pain in humans (44) and  
350 drives pain in the DMM OA model (45), as well as directly inducing DRG neuron  
351 hyperexcitability *in vitro* (46). We established three experimental groups: a Ctrl group with  
352 DRG neurons maintained in normal culture medium, an NGF group with DRG neurons  
353 incubated with NGF for 40-48-hours, and an NGF + MSC-EVs group in which DRG  
354 neurons were incubated in NGF for 24-hours and then NGF + MSC-EVs for 16-24-hours (Fig.  
355 4A). As expected, NGF treated DRG neurons had a lower RMP (Ctrl:  $-51.78 \pm 1.19$  mV vs.  
356 NGF:  $-45.48 \pm 1.4$  mV;  $p = 0.002$ , One-way ANOVA with Tukey's post hoc test, Fig. 4B) and  
357 exhibited a lower AP threshold (Ctrl:  $706.5 \pm 48.22$  pA vs. NGF:  $568.2 \pm 47.39$  pA;  $p = 0.04$ ,  
358 One-way ANOVA with Tukey's post hoc test, Fig. 4C) than the Ctrl group. However, with the  
359 addition of MSC-EVs at 24-hours, the RMP of DRG neurons was not significantly different to  
360 that of DRG neurons in the Ctrl group (NGF + MSC-EVs:  $-49.9 \pm 1.3$  mV,  $p = 0.059$ , One-  
361 way ANOVA with Tukey's post hoc test) and nor was the AP threshold (NGF + MSC-EVs:  
362  $730 \pm 54.34$  pA,  $p = 0.94$ , One-way ANOVA with post Tukey test) (Fig. 4B-C). Unlike what  
363 was observed in knee-innervating DRG neurons isolated from DMM mice (Fig. 3D,F), no  
364 significant change was seen in HPD duration or AHP duration in NGF treated DRG neurons,  
365 but in a similar manner to knee-innervating DRG neurons isolated from DMM mice no  
366 difference was observed in the AHP amplitude (Fig. 4D-F, summarized in Table 2). We again  
367 investigated whether the change in AP threshold might correlate with any change in the  
368 properties of voltage-gated ion channel currents. Unlike in knee-innervating neurons isolated  
369 from DMM mice, we observed that NGF treated DRG neurons exhibited a larger voltage-gated  
370 inward current than Ctrl DRG neurons (peak normalized current: Ctrl:  $1.31 \pm 0.09$ , NGF:  $2.61$   
371  $\pm 0.42$ ,  $p = 0.003$ , One-way ANOVA with Tukey's post hoc test, Fig. 4G-H) and that this effect  
372 was not observed in the NGF + MSC-EV treated DRG neuron group (NGF + MSC-EVs:  $1.59$   
373  $\pm 0.27$ ,  $p = 0.74$ , One-way ANOVA with Tukey's post hoc test); no difference was observed  
374 in the half-maximal activation potential ( $V_{1/2}$ ) between Ctrl and NGF neurons (Ctrl:  $-47.18 \pm$   
375  $1.89$ , NGF:  $-50.12 \pm 2.15$ ,  $p = 0.31$ , unpaired t test). In addition, voltage-gated outward current  
376 amplitude was also larger in NGF treated neurons compared to Ctrl DRG neurons, but this was

377 only partially, and not significantly, reversed in neurons from the NGF + MSC-EV treated  
 378 group (peak normalized current: Ctrl:  $1.01 \pm 0.08$ , NGF:  $1.81 \pm 0.32$ ,  $p = 0.03$ , NGF+MSC-  
 379 EVs:  $1.31 \pm 0.25$ ,  $p = 0.6$ , One-way ANOVA with Tukey's post hoc test, Fig. 4I-J).

380

Figure 4

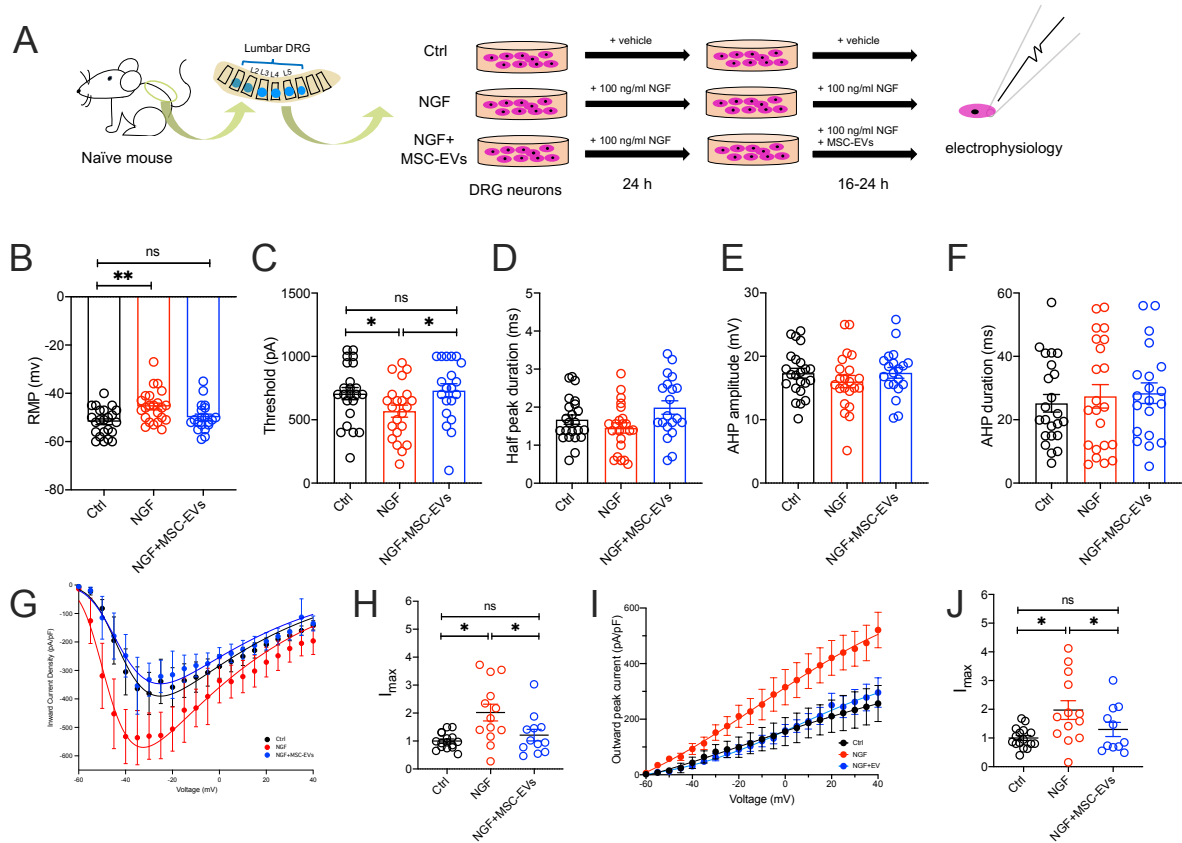

381

382 **Fig. 4. MSC-EVs normalize DRG neuron excitability *in vitro*.** ((A) Schematic experimental design of *in vitro*  
 383 study. (B) RMP of DRG neurons from three different experimental groups. (C) Threshold for AP firing and AP  
 384 properties including HPD (D), AHP amplitude (E), and AHP duration (F) of DRG neurons from each experimental  
 385 group. Plots of voltage-gated inward current (G) and outward current (I) density of DRG neurons normalized by  
 386 cell capacitance in different conditions. Peak voltage-gated inward current (H) and outward current (J) normalized  
 387 by max current density of Ctrl neurons. \* $p < 0.05$ , \*\* $p < 0.01$ . One-way ANOVA with Tukey's post doc test.

388 **Discussion**

389 Numerous pre-clinical (22-24, 26-28) and clinical studies (22) have demonstrated the potential  
390 use of MSCs and/or MSC-EVs in treating OA, but the mechanism through which any pain-  
391 relieving effects manifest has rarely been examined. When administered at early stages in  
392 animal models, both MSCs and MSC-EVs can reduce the extent of disease progression (27)  
393 and therefore, in this study we deliberately introduced MSCs or MSC-EVs at a time point at  
394 which OA and the associated pain behaviors were established to measure if either treatment  
395 could specifically ameliorate pain. We found that hyperexcitability of knee-innervating  
396 neurons in DMM mice was concomitant with behavior changes and that intra-articular injection  
397 of either MSCs or MSC-EVs reduced those same behavior changes, as well as normalizing  
398 knee-innervating neuron hyperexcitability. Thus, our results suggest that primary afferent  
399 hyperexcitability is causal in DMM OA pain, which supports results of prior studies in rodents  
400 and humans showing the importance of primary afferent input in OA pain (47), but is the first  
401 study to directly measure the excitability of such afferents in the DMM model. MSCs and  
402 MSC-EVs have strong immunomodulatory properties and are promising therapeutics for  
403 various inflammatory and degenerative diseases, including OA (31). While analgesic effects  
404 of MSCs are frequently reported in both preclinical and clinical studies (21-24), mechanisms  
405 behind these observations remain elusive. It is recognized that any analgesic effects might  
406 originate from immunomodulation and/or chondroprotection, for example, downregulation of  
407 inflammatory mediators that sensitize nociceptors in the OA joint (48), whereas  
408 chondroprotection is perhaps an unlikely mechanism because it has been reported that MSCs  
409 reduce pain regardless of regenerative changes in an advanced OA model (49). A complication  
410 is that OA pain is highly complex with multifactorial mechanisms involved, including both  
411 peripheral and central sensitization (12). Numerous molecules including NGF, angiotensin-  
412 converting enzyme (ACE), and CCL2 have proposed as major drivers of OA pain at the  
413 periphery (18). Indeed, the blockade of some of these mediators or their receptors produces  
414 potent analgesia in OA models (20, 50). MSCs, on the other hand, exert their  
415 immunomodulatory effects, at least in part, through inducing overexpression of ACE and  
416 CCL2 in inflammatory diseases (51-53), which might enhance sensitization of knee-  
417 innervating sensory neurons leading to pain. Thus, it is possible that undiscovered analgesic  
418 mechanisms exist independent of currently known MSC functions.

419

420 Consistent with previous analysis (49), we observed improved pain-related behavior  
421 independent of any regenerative change in OA mouse knee joints following MSC or MSC-EV



422 treatment. In this research, we used three methods to monitor mouse behavior: rotarod, digging  
423 assay, and activity monitoring. In the rotarod test, we observed a locomotion deficit in  
424 untreated DMM mice at 16 weeks after surgery comparing to Sham mice at 16 weeks post-  
425 surgery and to the themselves at 4 weeks post-surgery, consistent with previous reports (40,  
426 54). Such a deficit was not observed in MSC or MSC-EV treated DMM mice. In the digging  
427 assay, reduced digging activity was seen in untreated DMM mice, but not Sham or MSC /  
428 MSC-EV treated DMM mice at week 16. Undeniably, innate mouse activity difference does  
429 exist among mice in different mouse groups. Mice in the DMM+MSC-EVs group had lower  
430 digging activity than mice in other groups before surgery, but at 16 weeks the same group  
431 presented similar digging activity as mice in the Sham and DMM+MSCs groups, and higher  
432 digging activity than their pre-surgery level, which suggests that observed digging difference  
433 pre-surgery appears to be compensated by repetitive digging measurements over the 16 weeks  
434 experimental period. With activity monitoring, we discovered for the first time that OA mice  
435 display enhanced levels of irregular activity during the resting period as disease progresses,  
436 similar to sleep disturbances seen in OA patients (50% - 80% of symptomatic OA patients  
437 report reduced sleep quality which is positively correlated with pain (5, 55)), while such  
438 irregularity was not seen in sham or treated DMM mice at 16 weeks, or in any mice pre-surgery.  
439 These results indicate that both MSCs and MSC-EVs normalize the rest pattern in OA mice.  
440 Collectively, these data suggested that irregular behavior changes shown in DMM mice were  
441 alleviated when DMM mice were treated with either MSCs or MSC-EVs (Fig.1C-J), and such  
442 behavior normalization was independent of joint histological improvement (Fig. 2).

443  
444 Sensory neuron sensitization is known to underlie the pain-related behavioral changes that  
445 occur in rat OA (56) and sensory neuron hyperexcitability is also common to mouse and sheep  
446 models of joint pain (13, 41, 57). Thus, we performed electrophysiological characterization of  
447 retrograde labelled, knee-innervating neurons and observed depolarization of the RMP and  
448 lowering of the AP threshold in knee-innervating neurons isolated from DMM mice compared  
449 to those isolated from sham mice, effects that were not observed in neurons isolated from DMM  
450 mice treated with MSCs or MSC-EVs (Fig. 3). This suggests that normalization of peripheral  
451 input may play a role in normalizing behavior. Despite this interesting observation, we  
452 acknowledge that normalization of peripheral sensory neuron excitability is unlikely to fully  
453 explain the observed behavioral changes as both peripheral and central sensitization  
454 components contribute to OA pain, e.g. sensitization of spinal nociceptive reflexes has been  
455 observed in a rat OA model (58). Whether the improved behavior reported in this study is the

456 result of changes to both peripheral and spinal nociceptive neuron activity change remains  
457 unclear. Although the changes observed in primary afferent neuron function could in turn alter  
458 spinal circuitry function, it is also possible that spinal circuitry function is also directly  
459 influenced by MSC-EVs as these small membrane vesicles are able to pass through the blood-  
460 brain barrier and alter neuronal activity in the central nervous system (59).

461

462 The normalization of peripheral sensory neuron excitability following MSC and MSC-EV  
463 injection observed in this study might result from two actions: i) direct action on sensory  
464 neurons, and/or ii) reduced nociceptive input/sensitization through modulation of surrounding  
465 cellular activity (e.g. reduced release of pro-inflammatory mediators by synoviocytes) (60). To  
466 address these potential mechanisms, we set up an *in vitro* model to test if MSC-EVs directly  
467 alter sensory neuron activity. We induced hypersensitivity in naive mouse DRG neurons by  
468 incubating with NGF *in vitro*, which is a major driver of OA pain (15) and induces DRG neuron  
469 hypersensitivity (61). As expected, NGF treated DRG neurons had a depolarized RMP and a  
470 lower AP threshold (Fig. 4B-C), which co-incubation with MSC-EVs prevented. This provides  
471 initial evidence that MSC-EVs may normalize nociception in the OA joint through direct action  
472 on joint sensory neurons, but obviously does not rule out an accompanying indirect effect.  
473 However, the NGF treated DRG neurons did not fully recapitulate the changes observed in  
474 knee-innervating neurons from DMM mice, e.g. the longer HPD and longer AHP duration seen  
475 in knee-innervating neurons isolated from DMM mice were not observed in NGF treated DRG  
476 neurons (Fig. 4D, F), and knee-innervating neurons from DMM mice did not exhibit the larger  
477 voltage-gated inward currents observed in NGF treated DRG neurons. Consequently, how  
478 MSC-EVs modulate neuronal function may differ *in vitro* vs. *in vivo*, but nonetheless data  
479 presented here establish models by which the modulatory mechanisms can be further  
480 investigated.

481

482 Indeed, the molecular mechanisms behind the observed sensory neuron modulation by MSC-  
483 EVs remain unknown. Based on current understanding of MSC-EV biology, this phenomenon  
484 might be achieved by a variety of different actions. This is because EVs are known to transfer  
485 a rich profile of biomolecules (i.e., proteins, lipids, and nucleic acids) to the recipient cells  
486 through internalization (62). These transferred molecules could alter sensory neuron  
487 excitability through modulating ion channel expression or function via different routes. For  
488 example, carried microRNAs (e.g. miR-46) can activate second messenger signaling (e.g. p38  
489 MAPK signaling) in neurons and are a key regulator of ion channel activity (63), and lipids

490 can act as epigenetic modulators to change ion channel expression (64, 65). Additionally, EVs  
491 can also act on cells through direct receptor-ligand binding (66), which activates downstream  
492 signaling and could lead to changes in ion channel activity. Future research is required to  
493 profile MSC-EVs content and identify key molecules influencing sensory neuron excitability  
494 in OA pain.

495

496 Despite the well-known therapeutic properties of MSCs in OA, their analgesic effects are rarely  
497 studied. Our study, for the first time, investigated changes in sensory neuron in the OA joint  
498 and how these are altered by the presence of MSCs or MSC-EVs. In doing so, we have  
499 discovered that MSC-EVs normalize sensory neuron hyperexcitability both *in vivo* and *in vitro*.  
500 This result opens the possibility of using MSC-EVs for chronic pain management and future  
501 studies should focus on identifying molecular mechanisms involved in the analgesic effects  
502 observed, which raises the possibility of engineering MSC-EVs with enrichment of specific  
503 molecules for use as novel pain therapeutics in OA and other chronic pain conditions.

504

505

506 **Material and methods**

507

508 **Animals**

509 All animal experiments were regulated under the Animals (Scientific Procedures) Act 1986  
510 Amendment Regulations 2012 following ethical review by the University of Cambridge  
511 Animal Welfare and Ethical Review Body (AWERB).

512

513 A total 36 of C57BL/6J male mice aged between 10 weeks to 12 weeks were used for in vivo  
514 study. Mice were purchased from Charles River UK Ltd (Charles River, UK) and assigned into  
515 4 experimental groups of 9 mice: Sham, DMM, DMM+MSCs and DMM+MSC-EVs. All mice  
516 were housed in digital individually ventilated cages (DVC) (Cage model GM500, Tecniplast  
517 S.p.A., Italy) in a group of 3 with standard water and food supply during the experiment period.  
518 Mice were on a normal 12h light/dark cycle at set temperature (21°C) and were regularly  
519 monitored by animal technicians, as well as experimenters when undergoing procedures. All  
520 the surgical procedures and knee injections performed on mice were carried out under general  
521 anesthesia (GA) unless stated otherwise. GA was induced by 4% inhalable isoflurane (Zoties,  
522 USA) and maintained by 2.5% (v/v) isoflurane during procedures. Mice were sacrificed after  
523 16 weeks post-surgery by CO<sub>2</sub> exposure followed by cervical dislocation.

524

525 **Destabilization of the medial meniscus (DMM) surgery**

526 DMM surgery was performed as previously described (67). A 3 mm incision was made parallel  
527 to the patella on the left leg to expose the stifle joint and the joint capsule was immediately  
528 opened using a 15 micro-surgical blade (Swann-Moston, UK). A 30-gauge needle (Terumo  
529 AGANI, UK) was used to bluntly dissect the fat pad and expose the medial meniscus (MM).  
530 The medial meniscotibial ligament (MMLT) anchoring the medial meniscus to the tibial  
531 plateau was carefully cut using a SM65A blade (Swann-Moston, UK). Skin incision was  
532 sutured using 6-0 Vicryl® (Ethicon, Belgium). Sham surgery was performed under the same  
533 procedure, but without damaging the MMLT. Mice were allowed to recover in a 37 °C chamber  
534 (20% oxygen, Tecniplast S.p.A., Italy) with welfare checks every 15 mins for an hour until  
535 fully alert and no sign of lameness being present before being returned to their home cages.

536

537 **Knee Injections**

538 Stifle injections were performed under general anesthesia using a 10 µl syringe (Hamilton,  
539 USA) and a 30-gauge needle (Terumo AGANI, UK) through the patellar tendon. MSCs (2×10<sup>4</sup>

540 in 6  $\mu$ l, Lonza, UK) were injected in DMM operated mice at 14 weeks following the surgery.  
541 MSC-EVs (6  $\mu$ l) derived from  $2 \times 10^4$  MSCs were injected in to DMM operated mice at 12  
542 weeks and 14 weeks respectively (see supplementary material for MSCs culture, EVs harvest  
543 and characterization); MSCs were only injected once as they can continually release mediators,  
544 whereas MSC-EVs were injected twice to replenish the supply of mediators. 6  $\mu$ l of 0.9% saline  
545 were injected in untreated DMM and sham mice at 12 and 14 weeks. 1.5  $\mu$ l retrograde tracer  
546 Fast Blue (2% w/v in 0.9% saline; Polysciences, Germany) was injected into the operated stifle  
547 joints 7 days prior to mouse sacrifice to label knee innervating neurons.

548

#### 549 **Digital ventilated cage (DVC) system**

550 Mice were house in groups of 3 in individual DVC cages with 3 cages in each experimental  
551 group. All the DVC cages used are installed on a standard IVC rack (Tecniplast S.p.A., Italy)  
552 with external electronic sensors and uniformly distributed 12 contactless electrodes underneath  
553 the cage. Animal locomotion activity (referred to as activity in this paper) was monitored by  
554 capacitance changes in the electrodes caused by animal movement and computed as previously  
555 described (68). Weekly rest disturbance index (RDI) during light period was computed to  
556 capture irregular animal activity pattern as previously described (42). Data was processed and  
557 computed on DVC analytic platform (Tecniplast S.p.A., Italy).

558

#### 559 **Rotarod**

560 Mouse locomotion and coordination were carried out weekly using a rotarod apparatus (Ugo  
561 Basile 47600, Italy) from 4 weeks after surgery (69). Mice were placed on the rotarod at  
562 constant speed of 4 rmp for 1 min before entering the accelerating testing mode (4 rmp – 40  
563 rmp in 5 mins). Total time spend on the rotarod and the speed at the time of mouse falling, or  
564 two passive rotations were recorded. The same protocol was used to train mice one day before  
565 the first test.

566

#### 567 **Digging**

568 The digging test was carried out weekly in a standard individually ventilated cage (391 x 199  
569 x 160 mm) filled with Aspen midi 8/20 wood chip bedding (LBS Biotechnology) tamped down  
570 to a depth of ~4 cm. Each mouse was tested individually in a testing cage for 3 mins without  
571 food or water supply after 30 mins habituation in the testing room. Digging training was  
572 conducted one day before test. During training, the same digging procedure was carried twice  
573 with a 30-mins intermission in-between. All experiments were conducted between 12:30 –

574 14:30 in the same procedure room and videotaped by a camera (Sony FDR-AX53, UK).  
575 Analysis was conducted offline after the conclusion of all studies and following blinding of  
576 recordings. Digging duration (time mice spent displacing bedding material using paws) and the  
577 number of burrows produced during the testing period was analyzed for all videos by M.A.  
578 L.A.P and Q.M. each scored digging duration for a random subset of videos (36% videos were  
579 scored by two experimenters, R<sup>2</sup> correlation between scores was 0.95).

580

### 581 **DRG neuron culture**

582 Lumbar DRG (L2-L5) were collected post-mortem and placed into cold dissociation media (L-  
583 15 Medium (1×) + GlutaMAX-1 (Life Technologies, UK) supplemented with 24 mM  
584 NaHCO<sub>3</sub>). Dissected DRG were enzymatically digested in prewarmed collagenase solution (1  
585 mg/ml, 6 mg/ml Bovine serum albumin (BSA) in dissociation media, Sigma, UK) for 15 mins  
586 followed trypsin solution (1 mg/ml trypsin, 6 mg/ml Bovine serum albumin (BSA) in  
587 dissociation media, Sigma, UK) for 30 mins at 37 °C before mechanical trituration (i.e.  
588 pipetting up and down for 8 times). Briefly centrifugation (1000 rpm, 30s) was used to collect  
589 neurons from the supernatant. Trituration and centrifugation were repeated for 5 times until 10  
590 ml of supernatant was collected. Collected supernatant was centrifuged at 1000 rpm for 5 mins  
591 to obtain cell pellets, which were resuspended in culture media and plated on poly-D-lysine  
592 and laminin coated glass bottomed dishes (MatTek, USA). Neurons were incubated at 37 °C,  
593 5% CO<sub>2</sub> for overnight or 48-hours before electrophysiology depending on the experiments.

594

### 595 ***In vitro* coculture of DRG neurons and MSC-EVs**

596 Lumbar DRG (L2-L5) neurons from non-operated mice (N=4) were isolated and cultured as  
597 above, or with addition of mouse nerve growth factor beta (NGF-β, 100 ng/ml). After 24-hours,  
598 medium was replaced either without NGF-β, with 100 ng/ml NGF-β, or with NGF plus MSC-  
599 EV (10<sup>6</sup>/ml). Neurons were then cultured for another 16-24-hours before electrophysiology  
600 recordings.

601

### 602 **Electrophysiology**

603 DRG neurons were bathed in extracellular solution (ECS) (in mM): NaCl (140), KCl (4), CaCl<sub>2</sub>  
604 (2), MgCl<sub>2</sub> (1), glucose (4), HEPES (10), adjusted to pH 7.4 with NaOH, and osmolarity was  
605 adjusted to 280-295 mOsm by sucrose) and recorded by an EPC-10 amplifier (HEKA,  
606 Germany) with corresponding software Patchmaster. Patch glass pipettes (4-9 MΩ,  
607 Hilgenberg) were pulled by a P-97 Flaming/Brown puller (Sutter Instruments, USA) from

608 borosilicate glass capillaries and loaded with intracellular solution (ICS) (in mM)—KCl (110),  
609 NaCl (10), MgCl<sub>2</sub> (1), EGTA (1), and HEPES (10), adjusted to pH 7.3 with KOH (300-310  
610 mOsm). Ground electrode was placed in the bath to form a closed electric circuit. Fast blue  
611 labelled neurons were identified by LED excitation at 365 nm (Cairn Research, UK) with a  
612 450/30× filter tube. Pipette and cell membrane capacitance were compensated by Patchmaster  
613 macros and series resistance was compensated by >60%. Resting membrane potential, cell  
614 resistance and capacitance were recorded in current-clamp mode. Step current (100 pA to 1000  
615 pA) for 80 ms through 50 steps or no current were injected to generate action potential (AP)  
616 under current-clamp mode. AP threshold, half peak duration (HPD, ms), and  
617 afterhyperpolarization duration (AHP, ms) and amplitude (mV), were measured in FitMaster  
618 (HEKA, Germany) software as previous described (41). Voltage-sensitive ion channel  
619 activities were assessed under voltage-clamp mode with leak subtraction and series  
620 compensation. Cells were held at -120 mV for 240 ms before stepping to the test potential (-60  
621 mV to 50 mV in 5 mV increments) for 40 ms and returned to holding potential (-60 mV) for  
622 200 ms between sweeps. Peak inward and outward voltage-gated current density (pA/pF) were  
623 calculated by maximum current (normalized by subtracting average baseline amplitude (5s))  
624 amplitude dividing cell capacitance. Voltage-current relationships were fitted in IgorPro  
625 software (Wavemetrics, USA) using the following Boltzmann equation to determine reversal  
626 potential ( $E_{rev}$ ) and the half peak activation potential ( $V_{half}$ ):

627

$$628 \quad f(x) = \Gamma \times x \times \frac{1 - e^{-\frac{x-E_{rev}}{25mV}}}{1 - e^{-\frac{x}{25mV}}} \times \frac{1}{(1 + e^{-\frac{x-V_{half}}{slope}})^3}$$

629

630 where  $\Gamma$  is the constant, and  $x$  is the command potential. To compare the size of current density  
631 among neuron groups, the maximum inward or outward current density was normalized to  
632 those obtained from the sham neuron with maximum current as  $I_{max}$ .

633

### 634 **Histology**

635 Operated knee joints were collected post-mortem and fixed in 4% (v/v) paraformaldehyde  
636 (PFA, Sigma, UK) for 24-hours prior than decalcification. Fixed samples were washed in  
637 distilled water for 30 minutes before 21 days of decalcification in 14% (v/v)

638 ethylenediaminetetraacetic acid (EDTA, Sigma, UK) solution (pH 8, adjusted by NaOH  
639 pellets) at room temperature (21°C). The completion of decalcification was confirmed through  
640 the easy penetration of the tibia bone with a 27G needle. Decalcified joints were processed in  
641 graded ethanol series (30, 50, 75, 90, 95, 100 and 100%, 1-hour each), xylene (3×, 1.5-hour  
642 each), paraffin (3×, 2-hours each) (Fisher, UK) in tissue processor (Leica TP1020 tissue  
643 processor, UK) and embedded in paraffin using embedding station (Leica HistoCore Arcadia  
644 H embedding station, UK) following routine histological procedures. Embedded samples were  
645 sectioned to 7 µm sections using a microtome (Leica RM2235, UK), and mounted on  
646 HistoBond slides (StatLab, UK). Slides were deparaffinized and hydrated before staining.  
647 Slides were first heated at 60°C for 10 mins following three sequential xylene baths (5mins  
648 each), an increased series of ethanol solution (100%, 100%, 95%, 80%, 70%, 50%, 30%; 3  
649 mins each) and distilled water (5 mins) before staining. Hydrated slides were first stained with  
650 Weight's Iron Hematoxylin (Sigma, UK) working solution 7 mins and gently washed with  
651 running tap water for 10 mins to remove excessive stain, followed by 3 mins stain with 0.08%  
652 (w/v) fast green FCF (Sigma, UK), 10s 1% (w/v) Acetic acid, and 5 mins 0.1% (w/v) Safranin  
653 O (Sigma) before a single dip in 0.5% (w/v) Acetic acid. Slides were then briefly dehydrated  
654 with 100% ethanol (2 mins), cleared in xylene (2 mins) and mounted with ProLong® Gold  
655 Antifade Mountant (ThermoFisher, UK). Mounted slides were scanned by a PerciPoint O8  
656 microscope and imaged by corresponding ViewPoint software (PerciPoint, Germany). Images  
657 were scored blindly by M.A and Q.M using the OARSI scoring system (70).

658

## 659 **Statistics**

660 All data are presented as mean ± standard error of mean (SEM). Two-way ANOVA with  
661 Dunnett's multiple comparisons test was used for four groups comparison across time series.  
662 One-way ANOVA with Dunnett's multiple comparisons test was used for four groups  
663 comparison with sham group. Unpaired student t-test with was used for two-groups  
664 comparisons. Detailed statistical tests are described in individual figure legends. Statistical  
665 analysis and graph generation were carried in GraphPad Prism 8.0 software (USA).

666

667

668



669 **References**

- 670 1. E. R. Vina, C. K. Kwok, Epidemiology of osteoarthritis: Literature update. *Curr. Opin.*  
671 *Rheumatol.* **30**, 160–167 (2018).
- 672 2. K. E. Dreinhöfer, P. Dieppe, T. Stürmer, D. Gröber-Grätz, M. Flören, K. P. Günther,  
673 W. Puhl, H. Brenner, Indications for total hip replacement: Comparison of assessments  
674 of orthopaedic surgeons and referring physicians. *Ann. Rheum. Dis.* **65**(10):1346-50.  
675 (2006).
- 676 3. T. E. McAlindon, R. R. Bannuru, M. C. Sullivan, N. K. Arden, F. Berenbaum, S. M.  
677 Bierma-Zeinstra, G. A. Hawker, Y. Henrotin, D. J. Hunter, H. Kawaguchi, K. Kwok,  
678 S. Lohmander, F. Rannou, E. M. Roos, M. Underwood, OARSI guidelines for the non-  
679 surgical management of knee osteoarthritis. *Osteoarthr. Cartil.* **22**, 363–388 (2014).
- 680 4. C. M. McDonough, A. M. Jette, The contribution of osteoarthritis to functional  
681 limitations and disability. *Clin. Geriatr. Med.* **26**, 387–399 (2010).
- 682 5. R. Martinez, N. Reddy, E. P. Mulligan, L. S. Hynan, J. Wells, Sleep quality and  
683 nocturnal pain in patients with hip osteoarthritis. *Medicine (Baltimore)*. **98** (2019)
- 684 6. A. Sharma, P. Kudesia, Q. Shi, R. Gandhi, Anxiety and depression in patients with  
685 osteoarthritis: impact and management challenges. *Open access Rheumatol. Res. Rev.*  
686 **8**, 103–113 (2016).
- 687 7. T. Neogi, The epidemiology and impact of pain in osteoarthritis. *Osteoarthr. Cartil.*  
688 **21**, 1145–1153 (2013).
- 689 8. N. Moore, C. Pollack, P. Butkerait, Adverse drug reactions and drug-drug interactions  
690 with over-the-counter NSAIDs. *Ther. Clin. Risk Manag.* **11**, 1061–1075 (2015).
- 691 9. H. E. Eker, O. Y. Cok, A. Aribogan, G. Arslan, The efficacy of intra-articular  
692 lidocaine administration in chronic knee pain due to osteoarthritis: A randomized,  
693 double-blind, controlled study. *Anaesth. Crit. Care Pain Med.* **36**(2):109-114 (2017).
- 694 10. T. J. Schnitzer, R. Easton, S. Pang, D. J. Levinson, G. Pixton, L. Viktrup, I. Davignon,  
695 M. T. Brown, C. R. West, K. M. Verburg, Effect of Tanezumab on Joint Pain, Physical  
696 Function, and Patient Global Assessment of Osteoarthritis Among Patients With  
697 Osteoarthritis of the Hip or Knee: A Randomized Clinical Trial. *JAMA.* **322**, 37–48  
698 (2019).

- 699 11. A. D. Beswick, V. Wylde, R. Gooberman-Hill, A. Blom, P. Dieppe, What proportion  
700 of patients report long-term pain after total hip or knee replacement for osteoarthritis?  
701 A systematic review of Prospective studies in unselected patients. *BMJ Open*. **22**;2(1):  
702 e000435 (2012).
- 703 12. A. R. Haywood, G. J. Hathway, V. Chapman, Differential contributions of peripheral  
704 and central mechanisms to pain in a rodent model of osteoarthritis. *Sci. Rep.* **8**, 1–12  
705 (2018).
- 706 13. S. Chakrabarti, L. A. Pattison, B. Doleschall, R. H. Rickman, H. Blake, G. Callejo, P.  
707 A. Heppenstall, E. S. J. Smith, Intraarticular Adeno-Associated Virus Serotype AAV-  
708 PHP.S–Mediated Chemogenetic Targeting of Knee-Innervating Dorsal Root Ganglion  
709 Neurons Alleviates Inflammatory Pain in Mice. *Arthritis Rheumatol.* **72**, 1749–1758  
710 (2020).
- 711 14. M. Morgan, J. Thai, V. Nazemian, R. Song, J. J. Ivanusic, Changes to the activity and  
712 sensitivity of nerves innervating subchondral bone contribute to pain in late-stage  
713 osteoarthritis. *Pain*. **163**(2): 390-402 (2022)
- 714 15. K. E. McNamee, A. Burleigh, L. L. Gompels, M. Feldmann, S. J. Allen, R. O.  
715 Williams, D. Dawbarn, T. L. Vincent, J. J. Inglis, Treatment of murine osteoarthritis  
716 with TrkAd5 reveals a pivotal role for nerve growth factor in non-inflammatory joint  
717 pain. *Pain*. **149**(2): 386-392 (2010).
- 718 16. T. P. LaBranche, A. M. Bendele, B. C. Omura, K. E. Gropp, S. I. Hurst, C. M. Bagi, T.  
719 R. Cummings, L. E. Grantham, D. L. Shelton, M. A. Zorbas, Nerve growth factor  
720 inhibition with tanezumab influences weight-bearing and subsequent cartilage damage  
721 in the rat medial meniscal tear model. *Ann. Rheum. Dis.* **76**(1):295-302 (2017).
- 722 17. L. N. Nwosu, P. I. Mapp, V. Chapman, D. A. Walsh, Blocking the tropomyosin  
723 receptor kinase A (TrkA) receptor inhibits pain behaviour in two rat models of  
724 osteoarthritis. *Ann. Rheum. Dis.* **75**(6):1246-54 (2015).
- 725 18. T. L. Vincent, Peripheral pain mechanisms in osteoarthritis. *Pain*. **161**(1), S138–S146  
726 (2020).
- 727 19. L. Longobardi, J. D. Temple, L. Tagliaferro, H. Willcockson, A. Esposito, N.  
728 D’Onofrio, E. Stein, T. Li, T. J. Myers, H. Ozkan, M. L. Balestrieri, V. Ulici, R. F.

- 729 Loeser, A. Spagnoli, Role of the C-C chemokine receptor-2 in a murine model of  
730 injury-induced osteoarthritis. *Osteoarthr. Cartil.* **25**, 914–925 (2017).
- 731 20. J. Miotla Zarebska, A. Chanalaris, C. Driscoll, A. Burleigh, R. E. Miller, A. M.  
732 Malfait, B. Stott, T. L. Vincent, CCL2 and CCR2 regulate pain-related behaviour and  
733 early gene expression in post-traumatic murine osteoarthritis but contribute little to  
734 chondropathy. *Osteoarthr. Cartil.* **25**, 406–412 (2017).
- 735 21. R. E. Miller, S. Ishihara, P. B. Tran, S. B. Golub, K. Last, R. J. Miller, A. J. Fosang,  
736 A.-M. Malfait, An aggrecan fragment drives osteoarthritis pain through Toll-like  
737 receptor 2. *JCI Insight.* **3**(6): e95704 (2018).
- 738 22. H. Qu, S. Sun, Efficacy of mesenchymal stromal cells for the treatment of knee  
739 osteoarthritis: a meta-analysis of randomized controlled trials. *J. Orthop. Surg. Res.*  
740 **16**, 11 (2021).
- 741 23. H. Choi, R. H. Lee, N. Bazhanov, J. Y. Oh, D. J. Prockop, Anti-inflammatory protein  
742 TSG-6 secreted by activated MSCs attenuates zymosan-induced mouse peritonitis by  
743 decreasing TLR2/NF- $\kappa$ B signaling in resident macrophages. *Blood.* **118**, 330–338  
744 (2011).
- 745 24. M. Li, X. Sun, X. Kuang, Y. Liao, H. Li, D. Luo, Mesenchymal stem cells suppress  
746 CD8+T cell-mediated activation by suppressing natural killer group 2, member D  
747 protein receptor expression and secretion of prostaglandin E2, indoleamine 2, 3-  
748 dioxygenase and transforming growth factor- $\beta$ . *Clin. Exp. Immunol.* **178**, 516–524  
749 (2014).
- 750 25. A. R. R. Weiss, M. H. Dahlke, Immunomodulation by Mesenchymal Stem Cells  
751 (MSCs): Mechanisms of Action of Living, Apoptotic, and Dead MSCs. *Front.*  
752 *Immunol.* **10**, 1191 (2019).
- 753 26. L. Barkholt, E. Flory, V. Jekerle, S. Lucas-Samuel, P. Ahnert, L. Bisset, D. Büscher,  
754 W. Fibbe, A. Foussat, M. Kwa, O. Lantz, R. Mačiulaitis, T. Palomäki, C. K.  
755 Schneider, L. Sensebé, G. Tachdjian, K. Tarte, L. Tosca, P. Salmikangas, Risk of  
756 tumorigenicity in mesenchymal stromal cell-based therapies—Bridging scientific  
757 observations and regulatory viewpoints. *Cytotherapy.* **15**, 753–759 (2013).
- 758 27. S. Cosenza, M. Ruiz, K. Toupet, C. Jorgensen, D. Noël, Mesenchymal stem cells

- 759 derived exosomes and microparticles protect cartilage and bone from degradation in  
760 osteoarthritis. *Sci. Rep.* **7**(1):16214 (2017).
- 761 28. C. H. Woo, H. K. Kim, G. Y. Jung, Y. J. Jung, K. S. Lee, Y. E. Yun, J. Han, J. Lee, W.  
762 S. Kim, J. S. Choi, S. Yang, J. H. Park, D.-G. Jo, Y. W. Cho, Small extracellular  
763 vesicles from human adipose-derived stem cells attenuate cartilage degeneration. *J.*  
764 *Extracell. Vesicles.* **9**, 1735249 (2020).
- 765 29. X. Zhao, Y. Zhao, X. Sun, Y. Xing, X. Wang, Q. Yang, Immunomodulation of MSCs  
766 and MSC-Derived Extracellular Vesicles in Osteoarthritis. *Front. Bioeng. Biotechnol.*  
767 **8**, 575057 (2020).
- 768 30. S. EL Andaloussi, I. Mäger, X. O. Breakefield, M. J. A. Wood, Extracellular vesicles:  
769 biology and emerging therapeutic opportunities. *Nat. Rev. Drug Discov.* **12**, 347–357  
770 (2013).
- 771 31. S. Dabrowska, A. Andrzejewska, M. Janowski, B. Lukomska, Immunomodulatory and  
772 Regenerative Effects of Mesenchymal Stem Cells and Extracellular Vesicles:  
773 Therapeutic Outlook for Inflammatory and Degenerative Diseases. *Front. Immunol.*  
774 **11**: 591065 (2021).
- 775 32. S. Koniusz, A. Andrzejewska, M. Muraca, A. K. Srivastava, M. Janowski, B.  
776 Lukomska, Extracellular Vesicles in Physiology, Pathology, and Therapy of the  
777 Immune and Central Nervous System, with Focus on Extracellular Vesicles Derived  
778 from Mesenchymal Stem Cells as Therapeutic Tools. *Front. Cell. Neurosci.* **10**:109  
779 (2016).
- 780 33. S. Kourembanas, Exosomes: Vehicles of Intercellular Signaling, Biomarkers, and  
781 Vectors of Cell Therapy. *Annu. Rev. Physiol.* **77**, 13–27 (2015).
- 782 34. A. Ståhl, K. Johansson, M. Mossberg, R. Kahn, D. Karpman, Exosomes and  
783 microvesicles in normal physiology, pathophysiology, and renal diseases. *Pediatr.*  
784 *Nephrol.* **34**, 11–30 (2019).
- 785 35. K. H. Kim, J. H. Jo, H. J. Cho, T. S. Park, T. M. Kim, Therapeutic potential of stem  
786 cell-derived extracellular vesicles in osteoarthritis: preclinical study findings. *Lab.*  
787 *Anim. Res.* **36**, 10 (2020).
- 788 36. Hotham, WE, Thompson, C, Szu-Ting, L, Henson, FMD. The anti-inflammatory

- 789 effects of equine bone marrow stem cell-derived extracellular vesicles on autologous  
790 chondrocytes. *Vet Rec Open*. **8**: e22 (2021).
- 791 37. Y. Wang, D. Yu, Z. Liu, F. Zhou, J. Dai, B. Wu, J. Zhou, B. C. Heng, X. H. Zou, H.  
792 Ouyang, H. Liu, Exosomes from embryonic mesenchymal stem cells alleviate  
793 osteoarthritis through balancing synthesis and degradation of cartilage extracellular  
794 matrix. *Stem Cell Res Ther*. **8**, 189 (2017).
- 795 38. M. J. Piel, J. S. Kroin, A. J. Van Wijnen, R. Kc, H.-J. J. Im, Pain assessment in animal  
796 models of osteoarthritis. *Gene*. **537**, 184–188 (2014).
- 797 39. N. Sambamurthy, V. Nguyen, R. Smalley, R. Xiao, K. Hankenson, J. Gan, R. E.  
798 Miller, A.-M. Malfait, G. R. Dodge, C. R. Scanzello, Chemokine receptor-7 (CCR7)  
799 deficiency leads to delayed development of joint damage and functional deficits in a  
800 murine model of osteoarthritis. *J. Orthop. Res*. **36**, 864–875 (2018).
- 801 40. H. S. Hwang, I. Y. Park, J. I. Hong, J. R. Kim, H. A. Kim, Comparison of joint  
802 degeneration and pain in male and female mice in DMM model of osteoarthritis.  
803 *Osteoarthr. Cartil*. **29**, 728–738 (2021).
- 804 41. S. Chakrabarti, L. A. Pattison, K. Singhal, J. R. F. Hockley, G. Callejo, E. S. J. Smith,  
805 Acute inflammation sensitizes knee-innervating sensory neurons and decreases mouse  
806 digging behavior in a TRPV1-dependent manner. *Neuropharmacology*. **143**, 49–62  
807 (2018).
- 808 42. E. Golini, M. Rigamonti, F. Iannello, C. De Rosa, F. Scavizzi, M. Raspa, S. Mandillo,  
809 A Non-invasive Digital Biomarker for the Detection of Rest Disturbances in the  
810 SOD1G93A Mouse Model of ALS. *Front. Neurosci*. **14**, 1–12 (2020).
- 811 43. R. E. Miller, Y. S. Kim, P. B. Tran, S. Ishihara, X. Dong, R. J. Miller, A.-M. Malfait,  
812 Visualization of Peripheral Neuron Sensitization in a Surgical Mouse Model of  
813 Osteoarthritis by In Vivo Calcium Imaging. *Arthritis Rheumatol*. **70**, 88–97 (2018).
- 814 44. N. E. Lane, T. J. Schnitzer, C. A. Birbara, M. Mokhtarani, D. L. Shelton, M. D. Smith,  
815 M. T. Brown, Tanezumab for the Treatment of Pain from Osteoarthritis of the Knee.  
816 *N. Engl. J. Med*. **363**(16): 1521–1531 (2010).
- 817 45. C. Driscoll, A. Chanalaris, C. Knights, H. Ismail, P. K. Sacitharan, C. Gentry, S.  
818 Bevan, T. L. Vincent, Nociceptive Sensitizers Are Regulated in Damaged Joint

- 819 Tissues, Including Articular Cartilage, When Osteoarthritic Mice Display Pain  
820 Behavior. *Arthritis Rheumatol.* **68**(4):857-67 (2016).
- 821 46. Y. H. Zhang, J. Kays, K. E. Hodgdon, T. C. Sacktor, G. D. Nicol, Nerve growth factor  
822 enhances the excitability of rat sensory neurons through activation of the atypical  
823 protein kinase C isoform, PKM $\zeta$ . *J. Neurophysiol.* **107**, 315–335 (2011).
- 824 47. D. Syx, P. B. Tran, R. E. Miller, A. M. Malfait, Peripheral Mechanisms Contributing  
825 to Osteoarthritis Pain. *Curr. Rheumatol. Rep.* **20**, 1–11 (2018).
- 826 48. L. A. Pattison, E. Krock, C. I. Svensson, E. S. J. Smith, Cell–cell interactions in joint  
827 pain: rheumatoid arthritis and osteoarthritis. *Pain.* **162**(3):714-717. (2021).
- 828 49. G. M. Van Buul, M. Siebelt, M. J. C. Leijts, P. K. Bos, J. H. Waarsing, N. Kops, H.  
829 Weinans, J. A. N. Verhaar, M. R. Bernsen, G. J. V. M. Van Osch, Mesenchymal stem  
830 cells reduce pain but not degenerative changes in a mono-iodoacetate rat model of  
831 osteoarthritis. *J. Orthop. Res.* **32**, 1167–1174 (2014).
- 832 50. J. Collison, Anti-NGF therapy improves osteoarthritis pain. *Nat. Rev. Rheumatol.* **15**,  
833 450 (2019).
- 834 51. H. He, L. Liu, Q. Chen, A. Liu, S. Cai, Y. Yang, X. Lu, H. Qiu, Mesenchymal Stem  
835 Cells Overexpressing Angiotensin-Converting Enzyme 2 Rescue Lipopolysaccharide-  
836 Induced Lung Injury. *Cell Transplant.* **24**, 1699–1715 (2015).
- 837 52. Q. Liu, S. Lv, J. Liu, S. Liu, Y. Wang, G. Liu, Mesenchymal stem cells modified with  
838 angiotensin-converting enzyme 2 are superior for amelioration of glomerular fibrosis  
839 in diabetic nephropathy. *Diabetes Res. Clin. Pract.* **162**, 108093 (2020).
- 840 53. J. Giri, R. Das, E. Nylen, R. Chinnadurai, J. Galipeau, CCL2 and CXCL12 Derived  
841 from Mesenchymal Stromal Cells Cooperatively Polarize IL-10<sup>+</sup> Tissue Macrophages  
842 to Mitigate Gut Injury. *Cell Rep.* **30**, 1923-1934.e4 (2020).
- 843 54. S. Kojima, M. Watanabe, K. Asada, Locomotor activity and histological changes  
844 observed in a mouse model of knee osteoarthritis. *J. Phys. Ther. Sci.* **32**, 370–374  
845 (2020).
- 846 55. P. A. Parmelee, C. A. Tighe, N. D. Dautovich, Sleep disturbance in osteoarthritis:  
847 Linkages with pain, disability, and depressive symptoms. *Arthritis Care Res.*  
848 **67**(3):358-65 (2015).

- 849 56. A. Gomis, S. Meini, A. Miralles, C. Valenti, S. Giuliani, C. Belmonte, C. A. Maggi,  
850 Blockade of nociceptive sensory afferent activity of the rat knee joint by the  
851 bradykinin B2 receptor antagonist fasinabant. *Osteoarthr. Cartil.* **21**, 1346–1354  
852 (2013).
- 853 57. S. Chakrabarti, M. Ai, K. Wong, K. Newell, F. M. D. Henson, E. S. J. Smith,  
854 Functional Characterization of Ovine Dorsal Root Ganglion Neurons Reveal  
855 Peripheral Sensitization after Osteochondral Defect. *eNeuro*, **8**(5): ENEURO.0237-  
856 21.2021 (2021).
- 857 58. S. Kelly, K. L. Dobson, J. Harris, Spinal nociceptive reflexes are sensitized in the  
858 monosodium iodoacetate model of osteoarthritis pain in the rat. *Osteoarthr. Cartil.* **21**,  
859 1327–1335 (2013).
- 860 59. A. D. Do, I. Kurniawati, C.-L. Hsieh, T.-T. Wong, Y.-L. Lin, S.-Y. Sung, Application  
861 of Mesenchymal Stem Cells in Targeted Delivery to the Brain: Potential and  
862 Challenges of the Extracellular Vesicle-Based Approach for Brain Tumor Treatment.  
863 *Int. J. Mol. Sci.* **22**(20):11187 (2021).
- 864 60. S. Chakrabarti, Z. Hore, L. A. Pattison, S. Lalnunhlimi, C. N. Bhebhe, G. Callejo, D.  
865 C. Bulmer, L. S. Taams, F. Denk, E. S. J. Smith, Sensitization of knee-innervating  
866 sensory neurons by tumor necrosis factor- $\alpha$ -activated fibroblast-like synoviocytes: an  
867 in vitro, coculture model of inflammatory pain. *Pain.* **161**(9):2129-2141 (2020).
- 868 61. Y. H. Zhang, M. R. Vasko, G. D. Nicol, Ceramide, a putative second messenger for  
869 nerve growth factor, modulates the TTX-resistant Na<sup>+</sup> current and delayed rectifier K<sup>+</sup>  
870 current in rat sensory neurons. *J. Physiol.* **544**, 385–402 (2002).
- 871 62. M. Maumus, P. Rozier, J. Boulestreau, C. Jorgensen, D. Noël, Mesenchymal Stem  
872 Cell-Derived Extracellular Vesicles: Opportunities and Challenges for Clinical  
873 Translation. *Front. Bioeng. Biotechnol.* **8** (2020), p. 997.
- 874 63. D. Giunti, C. Marini, B. Parodi, C. Usai, M. Milanese, G. Bonanno, N. Kerlero de  
875 Rosbo, A. Uccelli, Role of miRNAs shuttled by mesenchymal stem cell-derived small  
876 extracellular vesicles in modulating neuroinflammation. *Sci. Rep.* **11**, 1740 (2021).
- 877 64. T. Skotland, K. Sagini, K. Sandvig, A. Llorente, An emerging focus on lipids in  
878 extracellular vesicles. *Adv. Drug Deliv. Rev.* **159**, 308–321 (2020).

- 879 65. L. A. Mulcahy, R. C. Pink, D. R. F. Carter, Routes and mechanisms of extracellular  
880 vesicle uptake. *J. Extracell. Vesicles*. **4**, 3 (2014).
- 881 66. R. Bazzoni, P. Takam Kanga, I. Tanasi, M. Krampera, Extracellular Vesicle-  
882 Dependent Communication Between Mesenchymal Stromal Cells and Immune  
883 Effector Cells. *Front. cell Dev. Biol.* **8**, 596079 (2020).
- 884 67. S. S. Glasson, T. J. Blanchet, E. A. Morris, The surgical destabilization of the medial  
885 meniscus (DMM) model of osteoarthritis in the 129/SvEv mouse. *Osteoarthr. Cartil.*  
886 **15**(9):1061-9 (2007).
- 887 68. K. Pernold, F. Iannello, B. E. Low, M. Rigamonti, G. Rosati, F. Scavizzi, J. Wang, M.  
888 Raspa, M. V. Wiles, B. Ulfhake, Towards large scale automated cage monitoring -  
889 Diurnal rhythm and impact of interventions on in-cage activity of C57BL/6J mice  
890 recorded 24/7 with a non-disrupting capacitive-based technique. *PLoS One*. **14**, 1–20  
891 (2019).
- 892 69. H. Shiotsuki, K. Yoshimi, Y. Shimo, M. Funayama, Y. Takamatsu, K. Ikeda, R.  
893 Takahashi, S. Kitazawa, N. Hattori, A rotarod test for evaluation of motor skill  
894 learning. *J. Neurosci. Methods*. **189**, 180–185 (2010).
- 895 70. S. S. Glasson, M. G. Chambers, W. B. Van Den Berg, C. B. Little, The OARSI  
896 histopathology initiative - recommendations for histological assessments of  
897 osteoarthritis in the mouse. *Osteoarthr. Cartil.* **18**, S17-23 (2010).
- 898



899 **Acknowledgements**

900 Authors acknowledge staff of the Mira Building, University of Cambridge for daily animal  
901 maintenance, and MRC Metabolic Diseases Unit, University of Cambridge for tissue  
902 processing. Authors thank Karin Newell for assisting animal surgery and substance  
903 administration, Dr Toni S. Taylor for the help with digging analysis, and Dr Stefano Gaburro  
904 for technical support of DVC analysis.

905

906 **Funding:** This work was supported by funding from Versus Arthritis (RG21973) to E.S.J.S  
907 and Horizon 2020 (RG90905) and Innovate UK (RG87266) to F.M.D.H. W.E.H was supported  
908 by the Horizon 2020 (RG90905). L.A.P was supported by the University of Cambridge BBSRC  
909 Doctoral Training Program (BB/M011194/1).

910

911 **Author contributions:** M.A., F.M.D.H., and E.St.J.S. conceptualized the study. M.A.  
912 performed the animal surgery, behavior assays, histology, cell culture and electrophysiology  
913 experiments, analyzed and visualized data, and draft the manuscript. W.E.H. harvested and  
914 characterized extracellular vesicles. L.A.P. performed digging behavior analysis and condition  
915 blinding. Q.M. performed digging and histology analysis. F.M.D.H. and E.St.J.S. revised the  
916 manuscript. All authors viewed and approved the final form of the manuscript.

917

918 **Competing interests:** The authors declare no competing interest.

919

920 **Data and materials availability:** All data needed to evaluate the conclusions in the paper are  
921 present in the paper and/or the Supplementary Materials.

922

923

924

925

926

927

928

929 **Table 1 Action potential properties of fast blue labelled DRG neurons.** RMP = resting membrane potential. n represents neuron numbers; N  
930 represents mice number. \* signifies  $p < 0.05$  comparing to sham knee neurons, One-way ANOVA with Dunnett's multiple comparisons test. &  
931 signifies  $p < 0.05$  comparing to DMM knee neurons, One-way ANOVA with Tukey's post doc test. \*\*, &&p<0.01, \*\*\*, &&&p<0.001.  
932

|                                               | Sham            |       | DMM             |       | DMM+MSCs      |       | DMM+MSC-EVs   |       |
|-----------------------------------------------|-----------------|-------|-----------------|-------|---------------|-------|---------------|-------|
|                                               | (n = 23, N = 6) |       | (n = 25, N = 6) |       | (n=30, N = 6) |       | (n=28, N = 6) |       |
|                                               | Mean            | SEM   | Mean            | SEM   | Mean          | SEM   | Mean          | SEM   |
| Diameter ( $\mu\text{m}$ )                    | 36.01           | 2.17  | 33.2            | 0.79  | 34.03         | 1.00  | 33.91         | 1.08  |
| RMP (mV)                                      | -48.96          | 1.78  | -37.52***       | 2.49  | -44.50&       | 2.03  | -45.25&       | 1.78  |
| Threshold (pA)                                | 509.60          | 45.93 | 350.8**         | 37.52 | 560&&&        | 43.56 | 607.5&&&&     | 37.79 |
| Half peak Duration<br>(HPD, ms)               | 1.53            | 0.20  | 2.73*           | 0.41  | 1.83          | 0.32  | 1.68&         | 0.14  |
| Afterhyperpolarization<br>duration (AHP, ms)  | 17.07           | 1.38  | 29.84**         | 3.54  | 18.27&        | 2.82  | 17.93&&       | 2.64  |
| Afterhyperpolarization<br>amplitude (AHP, mV) | 15.69           | 1.22  | 17.92           | 0.90  | 18.34         | 0.80  | 17.32         | 0.70  |

933

934 **Table 2 Action potential properties of mouse DRG neurons from *in vitro* groups.** RMP = resting membrane potential. n represents neuron  
 935 numbers; N represents mice number. \* signifies  $p < 0.05$  comparing to Ctrl group, One-way ANOVA with Dunnett's multiple comparisons test.  
 936 & signifies  $p < 0.05$  comparing to NGF group, One-way ANOVA with Tukey's post doc tests. \*\*, &&  $p < 0.01$ .  
 937

|                                            | Ctrl (n = 23, N = 4) |       | NGF (n = 23, N = 4) |       | NGF+MSC-EVs (n = 20, N = 4) |       |
|--------------------------------------------|----------------------|-------|---------------------|-------|-----------------------------|-------|
|                                            | Mean                 | SEM   | Mean                | SEM   | Mean                        | SEM   |
| Diameter ( $\mu\text{m}$ )                 | 31.51                | 1.01  | 30.93               | 0.78  | 31.24                       | 0.95  |
| RMP (mV)                                   | -51.78               | 1.19  | -45.48**            | 1.40  | -49.9&                      | 1.30  |
| Threshold (pA)                             | 706.5                | 48.22 | 568.2*              | 47.39 | 730&                        | 54.34 |
| Half peak Duration (HPD, ms)               | 1.67                 | 0.12  | 1.45                | 0.13  | 1.98&                       | 0.17  |
| Afterhyperpolarization duration (AHP, ms)  | 25.18                | 2.77  | 17.39               | 3.7   | 28.38                       | 3.25  |
| Afterhyperpolarization amplitude (AHP, mV) | 17.33                | 0.76  | 16.02               | 0.96  | 17.39                       | 0.84  |

938  
 939

940 **Supplementary Methods**

941

942 ***Extracellular vesicle isolation***

943 Extracellular vesicles were harvested based on previous description (36). MSCs were cultured  
944 in standard cell culture media  $\alpha$ -MEM (Thermo, UK) supplemented with 10% v/v fetal calf  
945 serum (thermo, UK), 1% (v/v) Glutamax (100 $\times$ ) (Gibco, UK), 1% (v/v) P/S (Gibco, UK), and  
946 incubated at 37 °C, 5% CO<sub>2</sub>. Passage three MSCs at 80% confluence were switched to serum  
947 free culture medium ( $\alpha$ -MEM (Thermo, UK), 1% (v/v) Glutamax (100 $\times$ ) (Gibco, UK), 1% (v/v)  
948 P/S (Gibco, UK)) for 48-hours incubation. The conditioned medium was then collected and  
949 centrifuged at 300 g for 5 minutes, with supernatant transferred to a falcon tube for further  
950 centrifugation at 2,000 g for 20 minutes at 4°C. Cell numbers were counted by a  
951 hemocytometer. Supernatant was then transferred into polycarbonate ultracentrifuge tubes  
952 (Beckman, USA) for differential sequential ultracentrifugation at 10,000 g for 45 minutes and  
953 100,000 g for 90 minutes. Collected pellet was resuspended in PBS for a further  
954 ultracentrifugation at 100,000 g for 90 minutes. Newly collected pellet was resuspended in 1ml  
955 PBS and stored at -70°C for use.

956

957 ***Nanoparticle Tracking Analysis***

958 Collected MSC-EVs sample was diluted 1:50 in PBS for Nanoparticle Tracking Analysis  
959 (NTA, Malvern, UK). Sample was further diluted from 1:100 to 1:500 with density over 50  
960 particles/frame. Diluted sample was loaded into a NanoSight LM10 Nanoparticle Analysis  
961 system following manufacturer's instruction with a syringe pump rate of 1,000 (Arbitrary  
962 units). The analysis was performed in NTA 1.4 analytical software.

963

964 ***BCA assay***

965 Total surface protein content of MSC-EVs was measured by the Pierce BCA Protein Assay Kit  
966 following manufacturer's instructions (Thermo scientific, UK).

967

968 ***Transmission electron microscope (TEM)***

969 The MSC-EV suspension was placed on 'Glow discharge disks' pre-prepared by the  
970 Cambridge Electron Microscopy group. The samples were negatively stained with 2% uranyl  
971 acetate in PBS (Sigma, USA) for 2 minutes followed by twice PBS wash and viewed under  
972 TEM. Images were acquired by an ORCA HR high resolution CCD camera with a Hamamatsu

973 DCAM board running Image Capture Engine software, version 600.323 (Advanced  
974 Microscopy Technology Corp., Danvers, MA, USA).

975

976 ***Flow cytometry***

977 MSC-EVS were conjugated to 1  $\mu$ l of 4% aldehyde/sulphate latex beads (Invitrogen, UK) by  
978 overnight incubation on a rotary wheel at room temperature with 1ml PBS. 110  $\mu$ l of 2 M  
979 glycine (Sigma, USA) was added following the overnight incubation step (final concentration  
980 200 mM) for 30 minutes before centrifugation at 3,000g for 5 minutes. The sample pellet was  
981 resuspended in 1 ml of 0.5% (v/v) FCS in PBS following supernatant removal. Same  
982 centrifugation step was applied with pellet was re-suspended in 50  $\mu$ l of 0.5% (v/v) FCS in  
983 PBS afterwards. Resuspended sample was then stained with 1  $\mu$ l PE anti-human CD9 Antibody  
984 (Biologend, UK) at 4 °C for 20 minutes before being diluted in 3ml of 0.5% (v/v) FCS in PBS,  
985 centrifuged at 3,000g, and resuspended in 300  $\mu$ l PBS. Fluorochrome compensation control  
986 was prepared by adding one drop of OneComp eBeads (eBioscience, UK) and 0.5  $\mu$ l of tested  
987 antibodies with distinct fluorochrome into 200  $\mu$ l 0.5% (v/v) FCS in PBS. Prepared samples  
988 were stored on ice and scanned by a BD FACS Canto II flow cytometry analyzer (BD  
989 Bioscience, UK) within 30 minutes after preparation. Analysis was performed in Kaluza  
990 software (Beckman coulter life science, USA) with corrected overlap emission through single  
991 stained compensation controls. Only single and live cells were gated during the analysis.

992
